# Supplementary material for: Effect on the conformation of monosubstituted pillar[5]arene: solvent, temperature, concentration and linker length
Source: Royal Society of Chemistry journal article supplement (doi:10.1039/d3ob01043k), 2023-01-01
Supplement: d3ob01043k1.pdf [file d3ob01043k1.pdf]

## Electronic Supplementary Information

### Effect on the conformation of monosubstituted pillar[5]arene: Solvent, temperature, concentration, and length of linker

Zhen Fu,<sup>‡</sup> Yanqing Jin,<sup>‡</sup> Bingqian Xie<sup>a</sup> and Hui Liu<sup>\*a</sup>

<sup>a</sup>Key Laboratory for Green Chemical Process of Ministry of Education, School of Chemical Engineering & Pharmacy, Wuhan Institute of Technology, 693 Xiongchu Avenue, Wuhan 430073, P. R. China

|                                                             |    |
|-------------------------------------------------------------|----|
| 1. Characterization of PIn                                  | 2  |
| 2. Fluorescence spectra of PIn in various solvents          | 18 |
| 3. Stoke shift and quantum yield of PIn in various solvents | 21 |
| 4. NOESY spectra of PIn in respective solvents              | 22 |
| 5. <sup>1</sup> H NMR of PIn at different temperature       | 26 |
| 6. Fluorescence spectra of PIn at different temperature     | 28 |
| 7. <sup>1</sup> H NMR of PIn at various concentrations      | 30 |
| 8. DOSY spectra of PIn                                      | 33 |

# Characterization

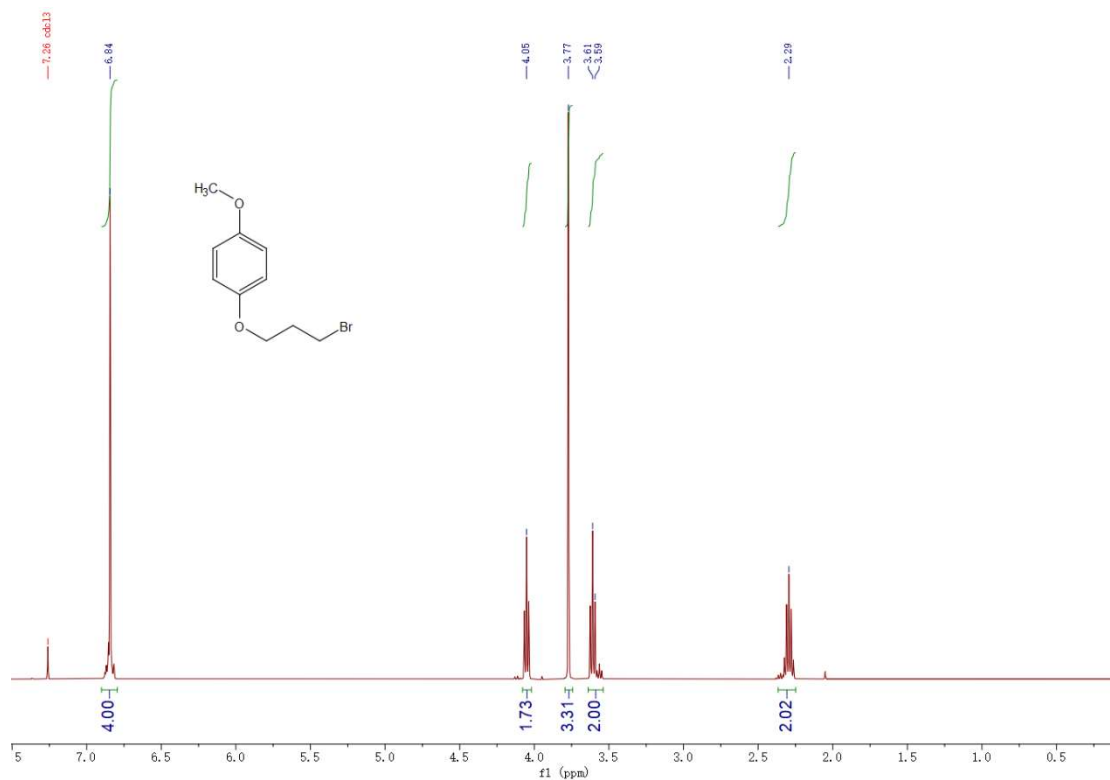

Figure S1. <sup>1</sup>H NMR of M1.

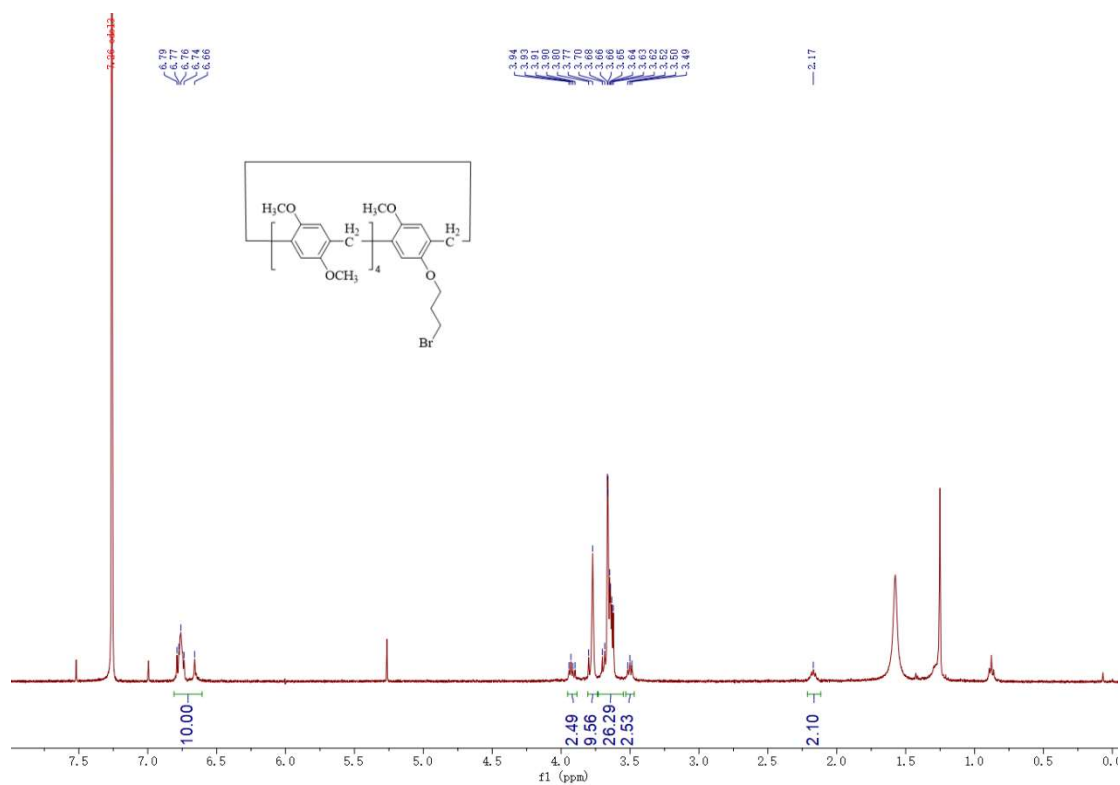

Figure S2. <sup>1</sup>H NMR of P1.

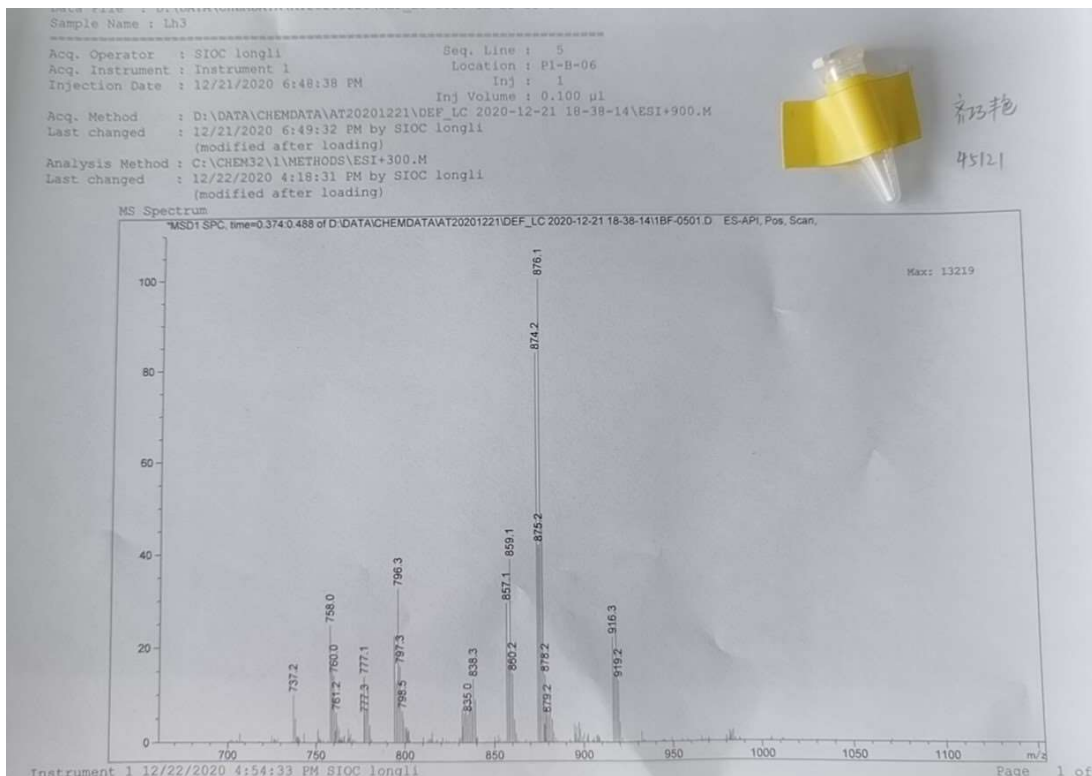

Figure S3. MS of P1.

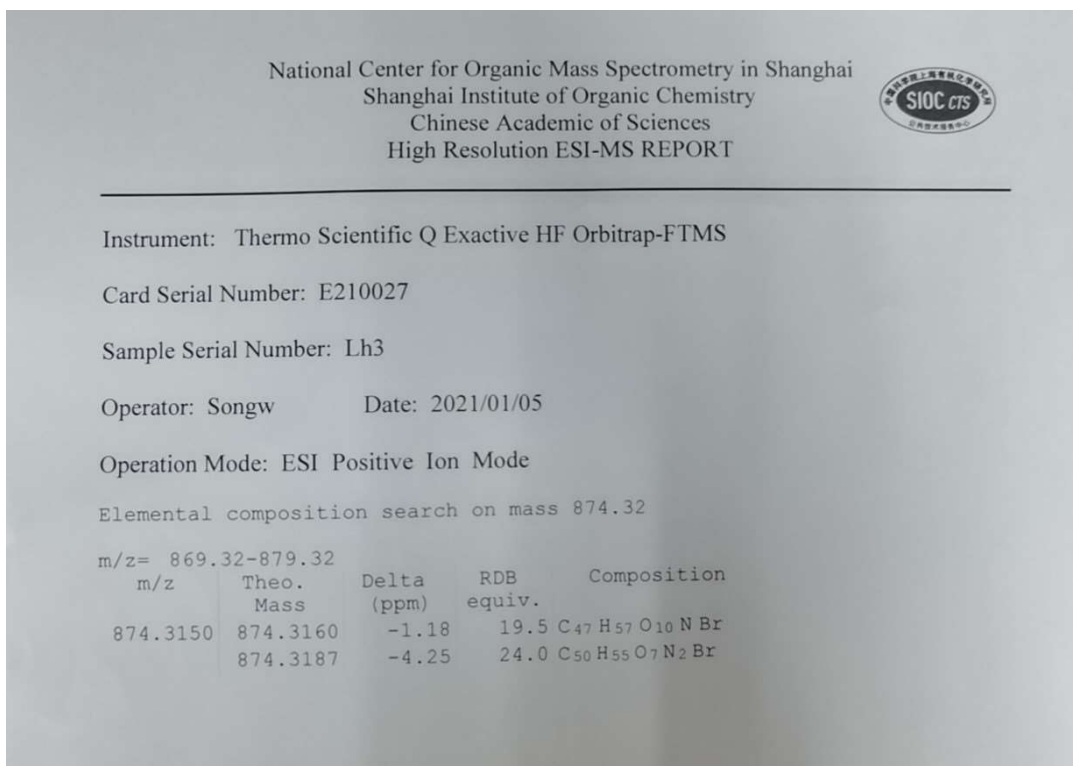

Figure S4. HRMS of P1.

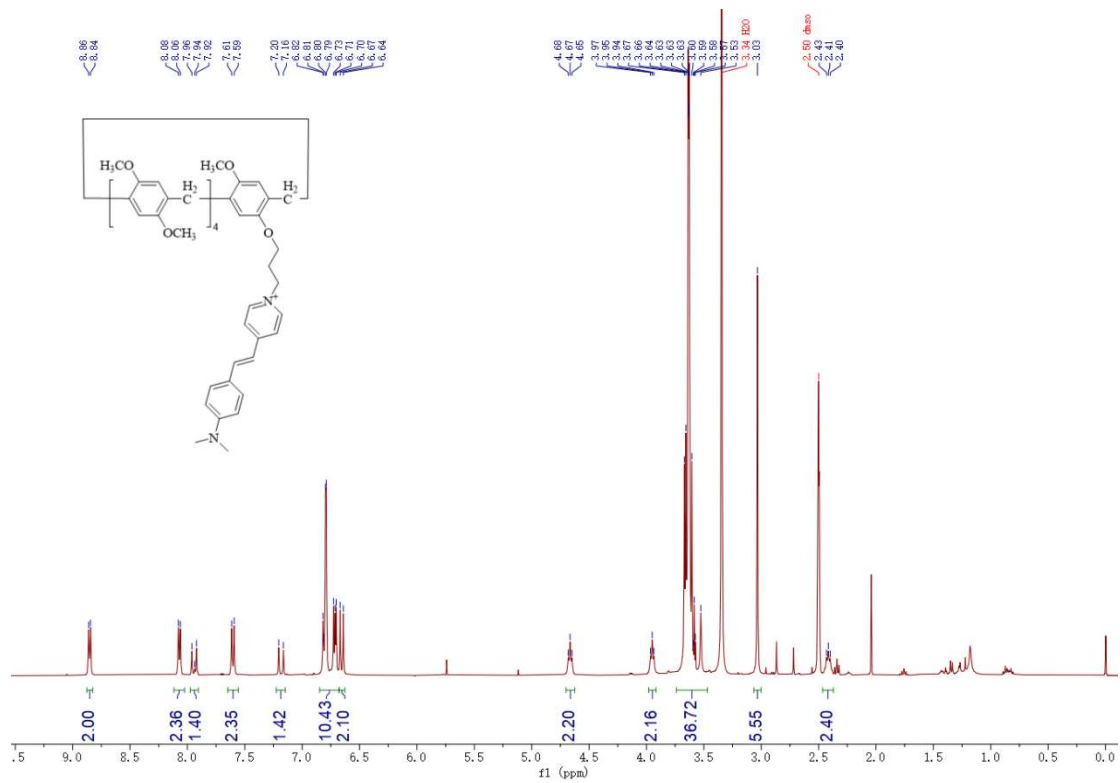

Figure S5. <sup>1</sup>H NMR of PI1.

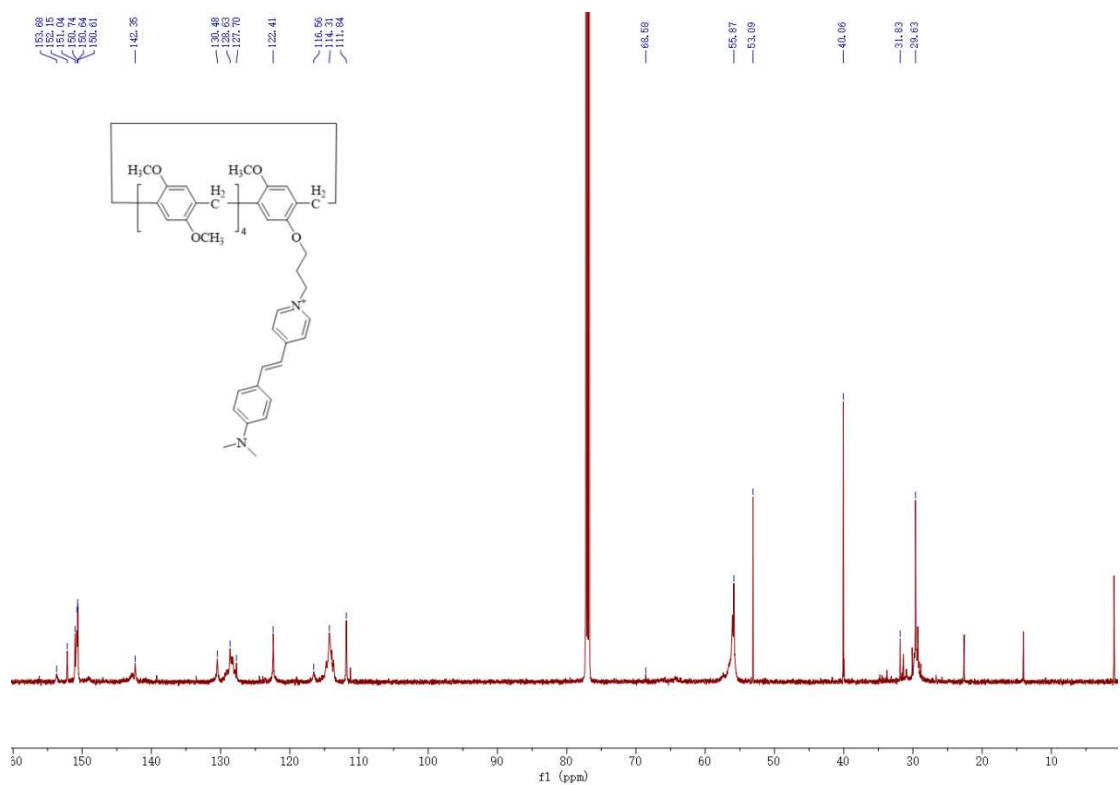

Figure S6. <sup>13</sup>C NMR of PI1.

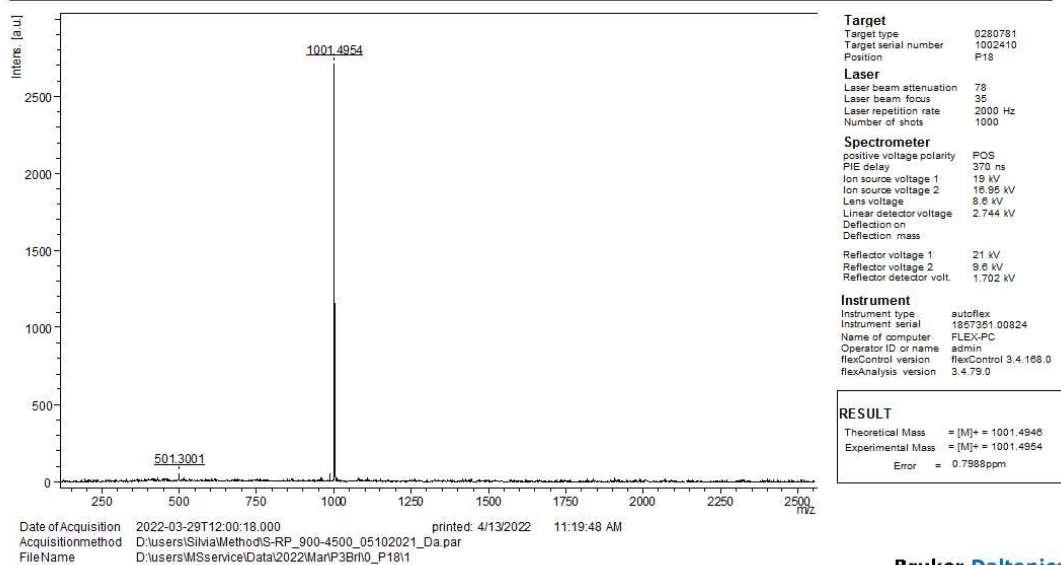

Bruker Daltonics

Figure S7. HRMS of PI1.

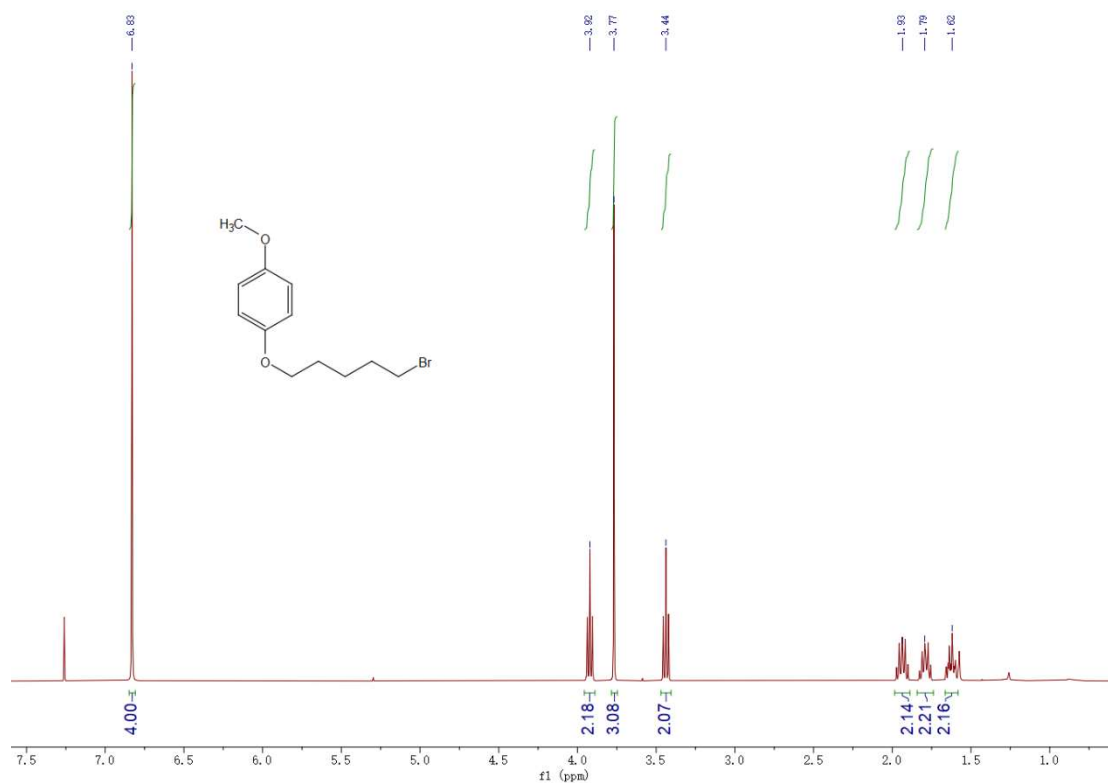

Figure S8. <sup>1</sup>H NMR of M2.

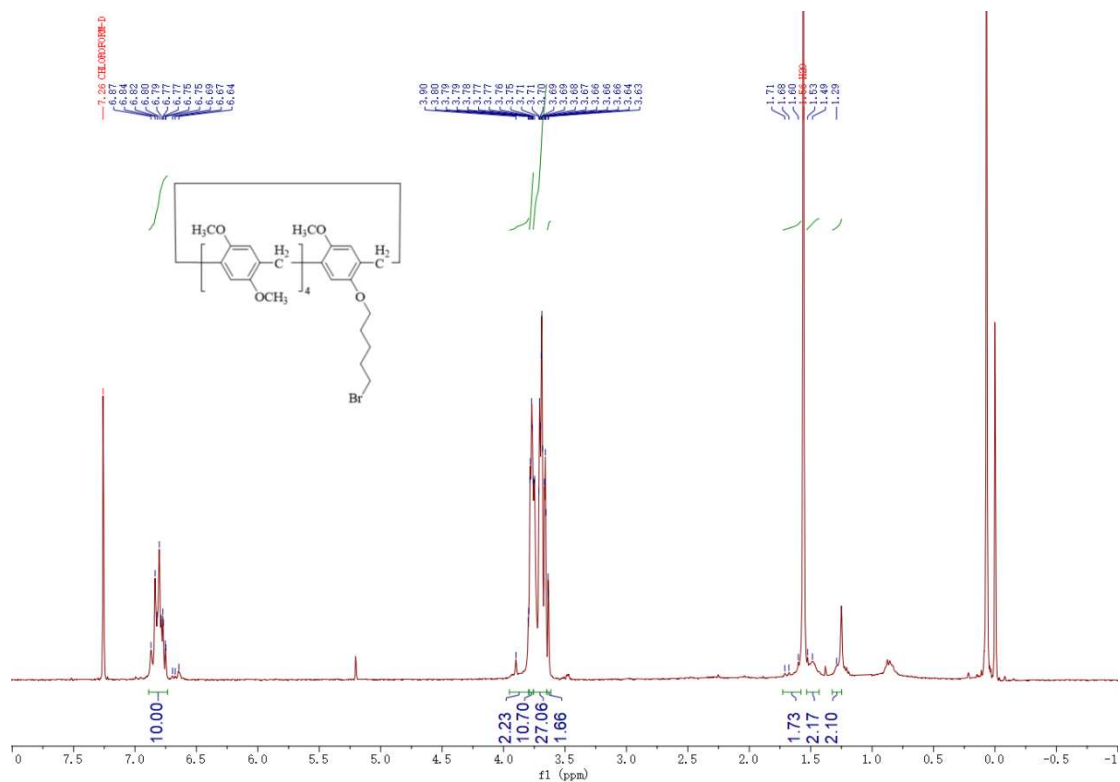

Figure S9. <sup>1</sup>H NMR of P2.

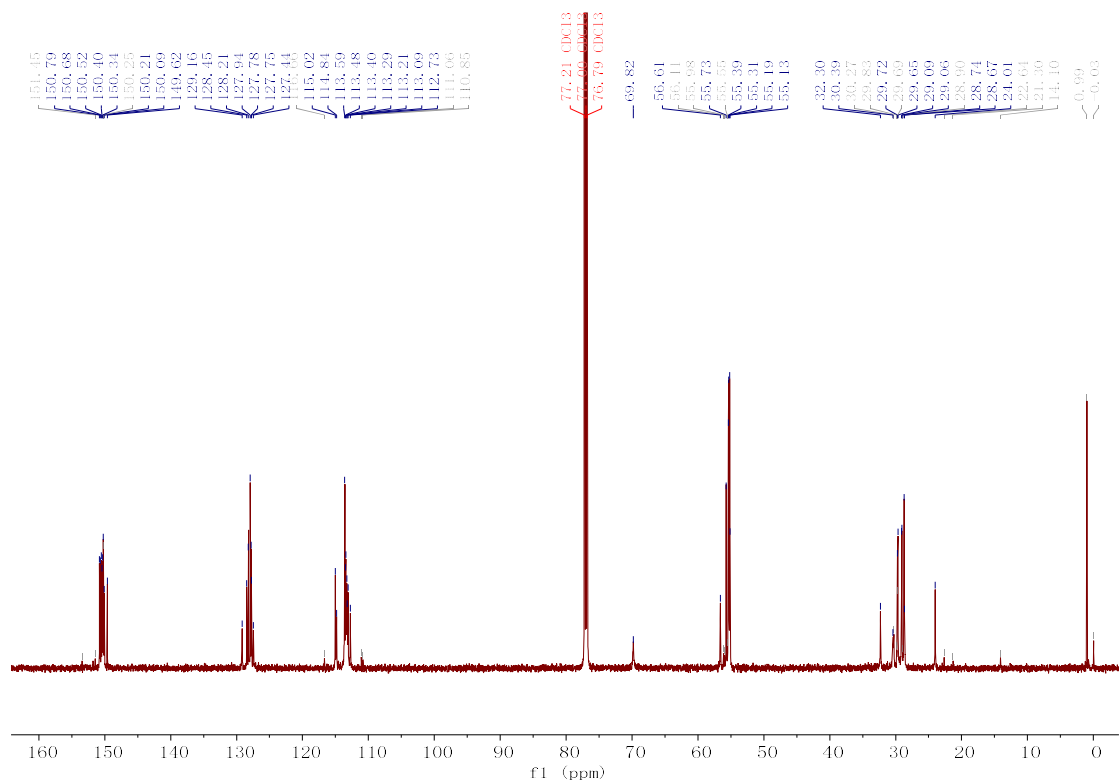

Figure S10. <sup>13</sup>C NMR of P2.



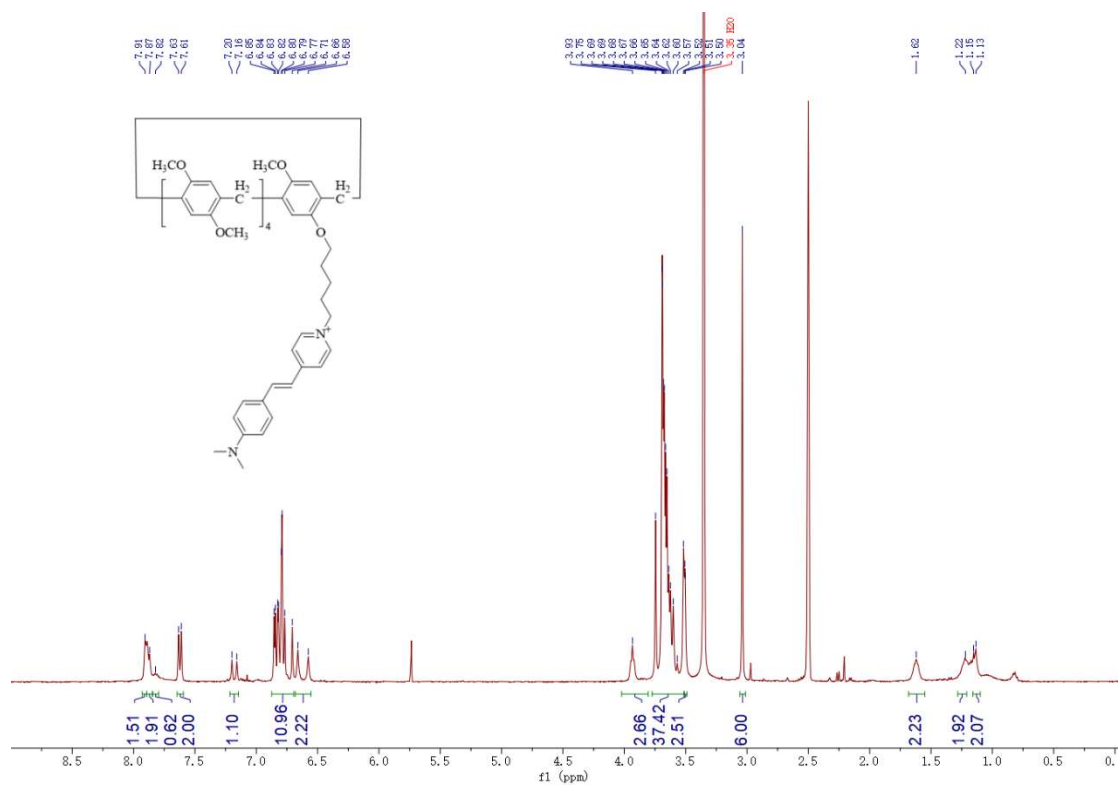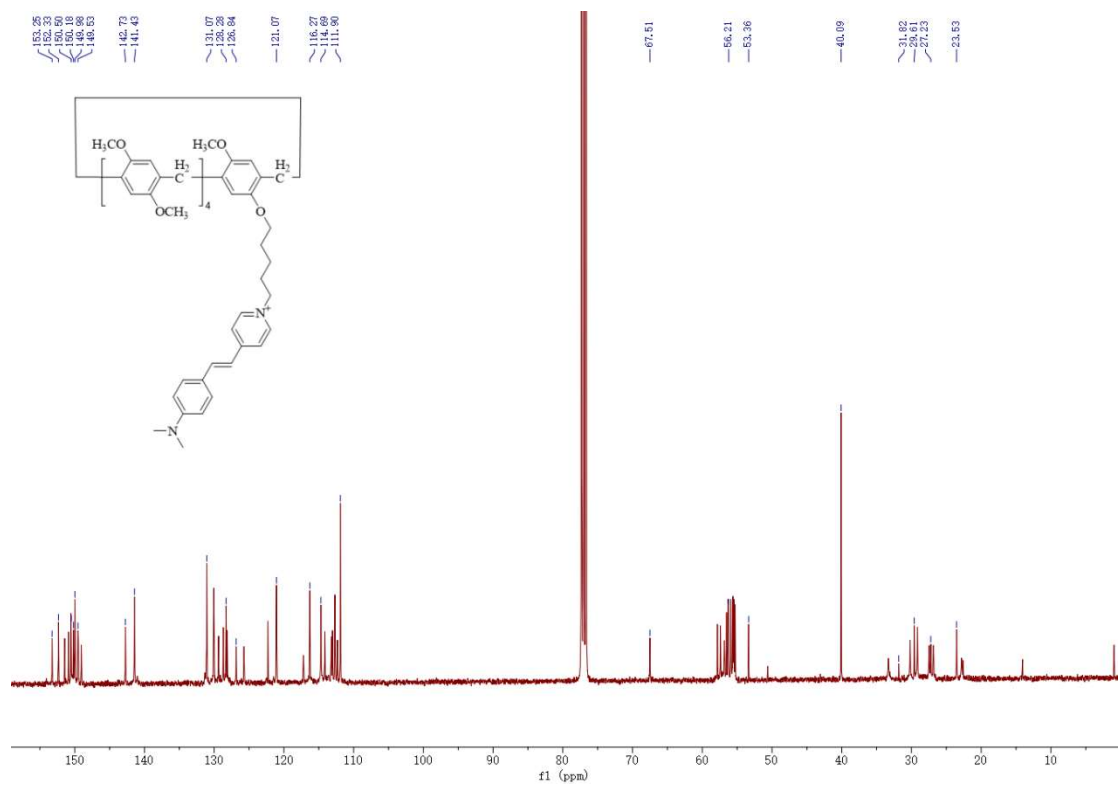



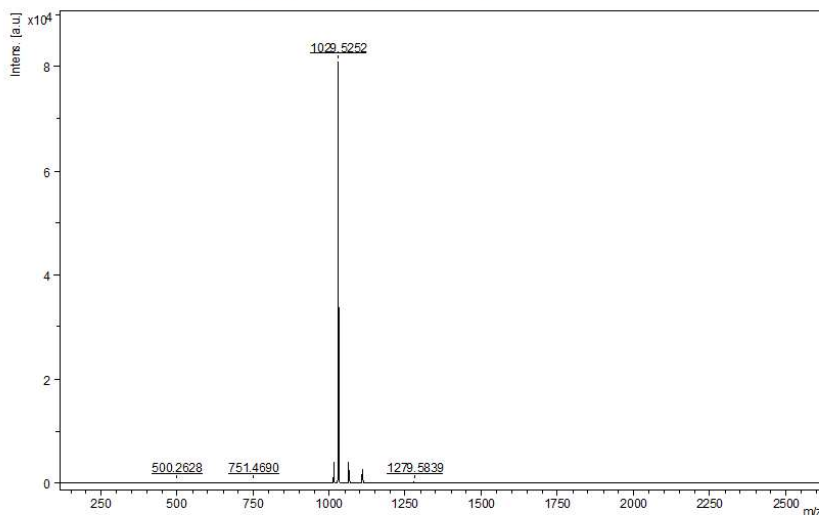

**Target**  
Target type 0290781  
Target serial number 1002410  
Position P19

**Laser**  
Laser beam attenuation 78  
Laser beam focus 35  
Laser repetition rate 2000 Hz  
Number of shots 3000

**Spectrometer**  
positive voltage polarity POS  
PIE delay 370 ns  
Ion source voltage 1 19 kV  
Ion source voltage 2 10.95 kV  
Lens voltage 8.6 kV  
Linear detector voltage 2.744 kV  
Deflection on  
Deflection mass

Reflector voltage 1 21 kV  
Reflector voltage 2 9.6 kV  
Reflector detector volt. 1.702 kV

**Instrument**  
Instrument type autoflex  
Instrument serial 1857351.00824  
Name of computer FLEX-PC  
Operator ID or name admin  
flexControl version flexControl 3.4.108.0  
flexAnalysis version 3.4.79.0

**RESULT**  
Theoretical Mass = [M]<sup>+</sup> = 1029.5259  
Experimental Mass = [M]<sup>+</sup> = 1029.5252  
Error = -0.6799ppm

Date of Acquisition 2022-03-29T12:02:58.000 printed: 4/13/2022 11:20:53 AM  
Acquisitionmethod D:\users\Silvia\Method\S-RP\_900-4500\_05102021\_Da.par  
FileName D:\users\MSservice\Data\2022\Mar\P5BrI0\_P191

Bruker Daltonics

Figure S15. HRMS of PI2.

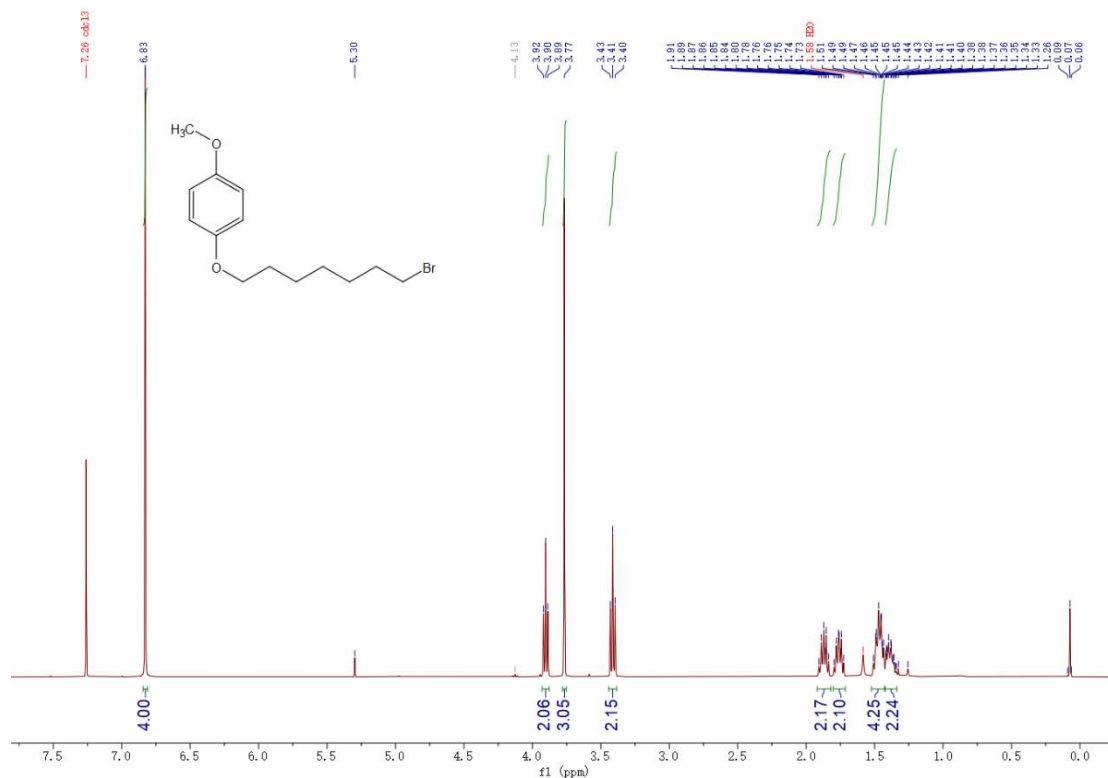

Figure S16. <sup>1</sup>H NMR of M3.

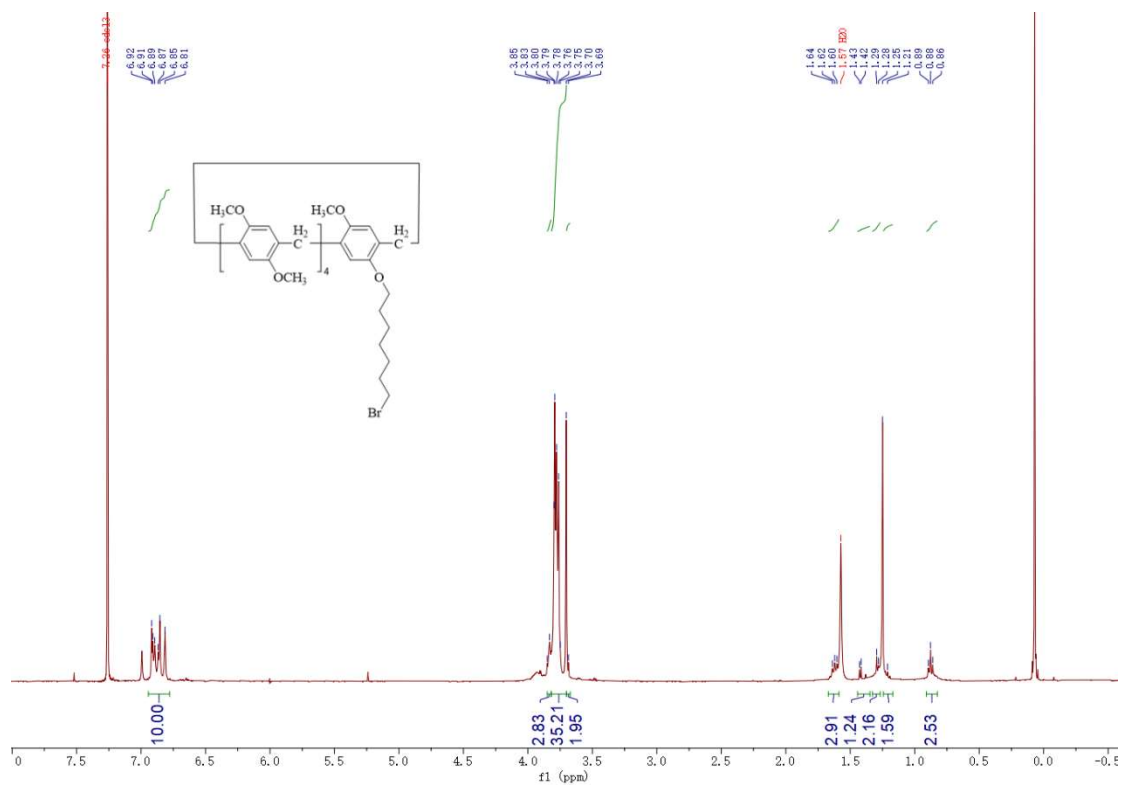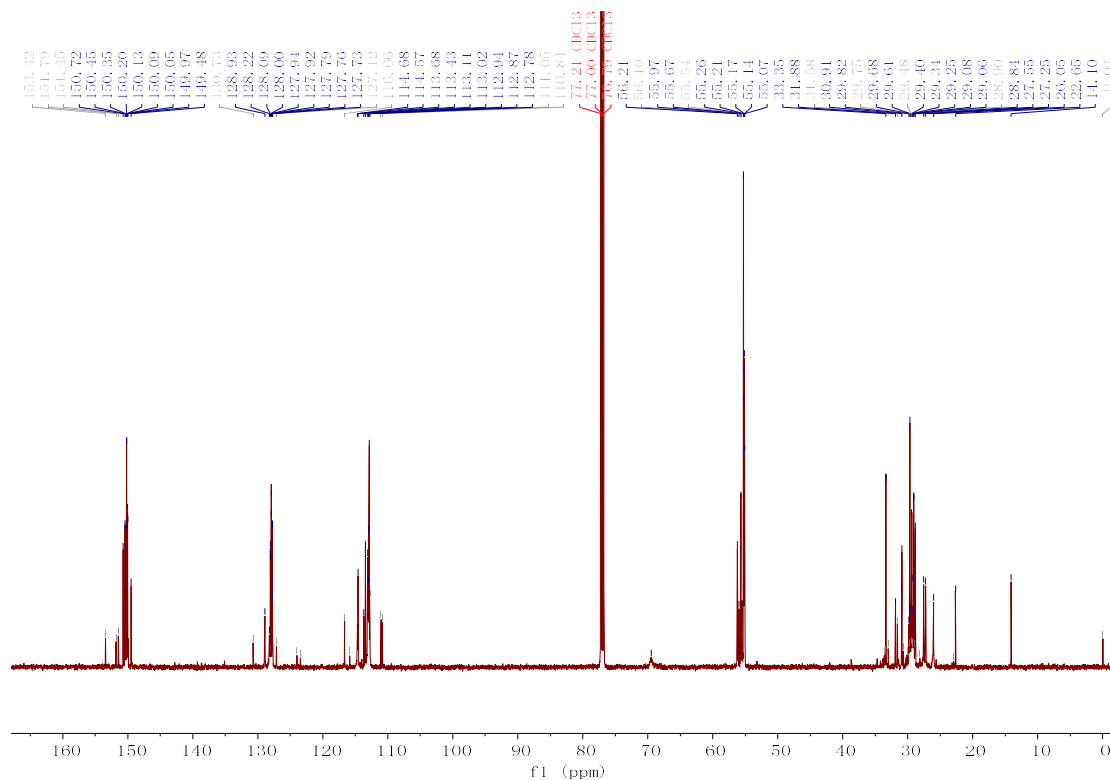

D:\data\AP MALDI\20220905\P7BR-1

P7BR-1 #25-36 RT: 0.36-0.52 AV: 12 NL: 3.35E4  
T: FTMS + p NSI Full ms [300.0000-2500.0000]

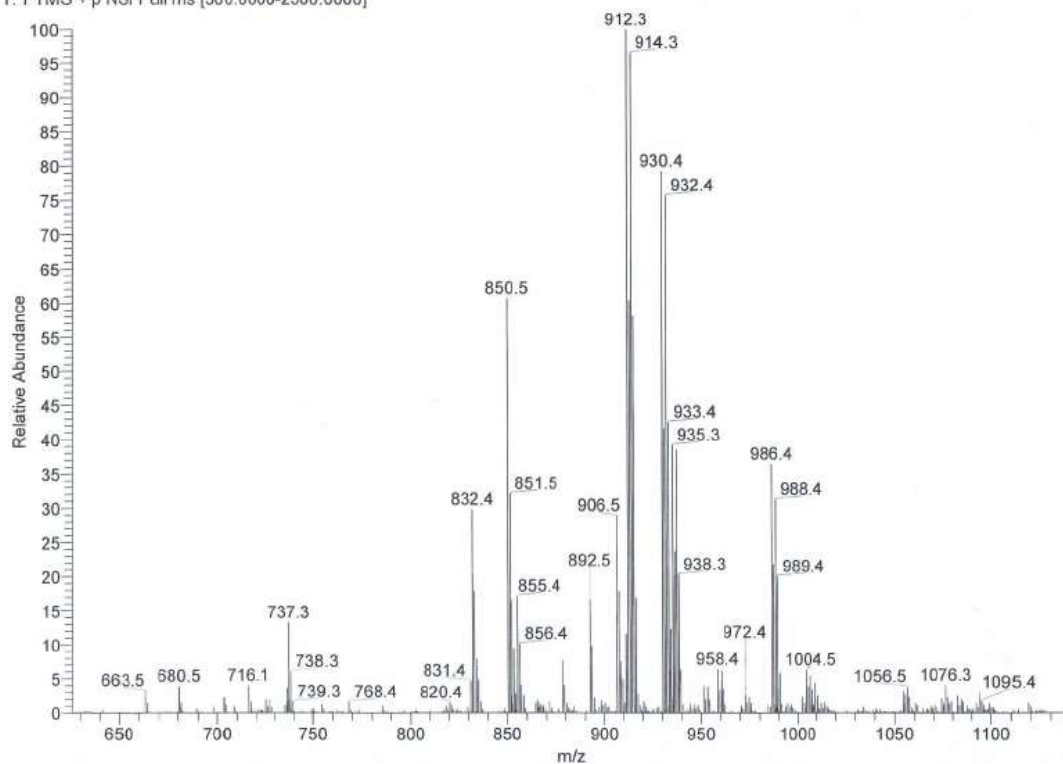

Figure S19. MS of P3.

National Center for Organic Mass Spectrometry in Shanghai  
Shanghai Institute of Organic Chemistry  
Chinese Academic of Sciences  
High Resolution AP-MALDI-MS REPORT

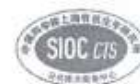

Instrument: Thermo Scientific Q Exactive HF Orbitrap-FTMS

Card Serial Number: E221704

Sample Serial Number: P7Br

Operator: Songw Date: 2022/09/06

Operation Mode: AP-MALDI Positive Ion Mode

Elemental composition search on mass 912.3420

m/z= 907.3420-917.3420

| m/z      | Theo. Mass | Delta (ppm) | RDB equiv. | Composition                                        |
|----------|------------|-------------|------------|----------------------------------------------------|
| 912.3420 | 912.3443   | -2.48       | 21.0       | C <sub>51</sub> H <sub>61</sub> O <sub>10</sub> Br |

Figure S20. HRMS of P3.

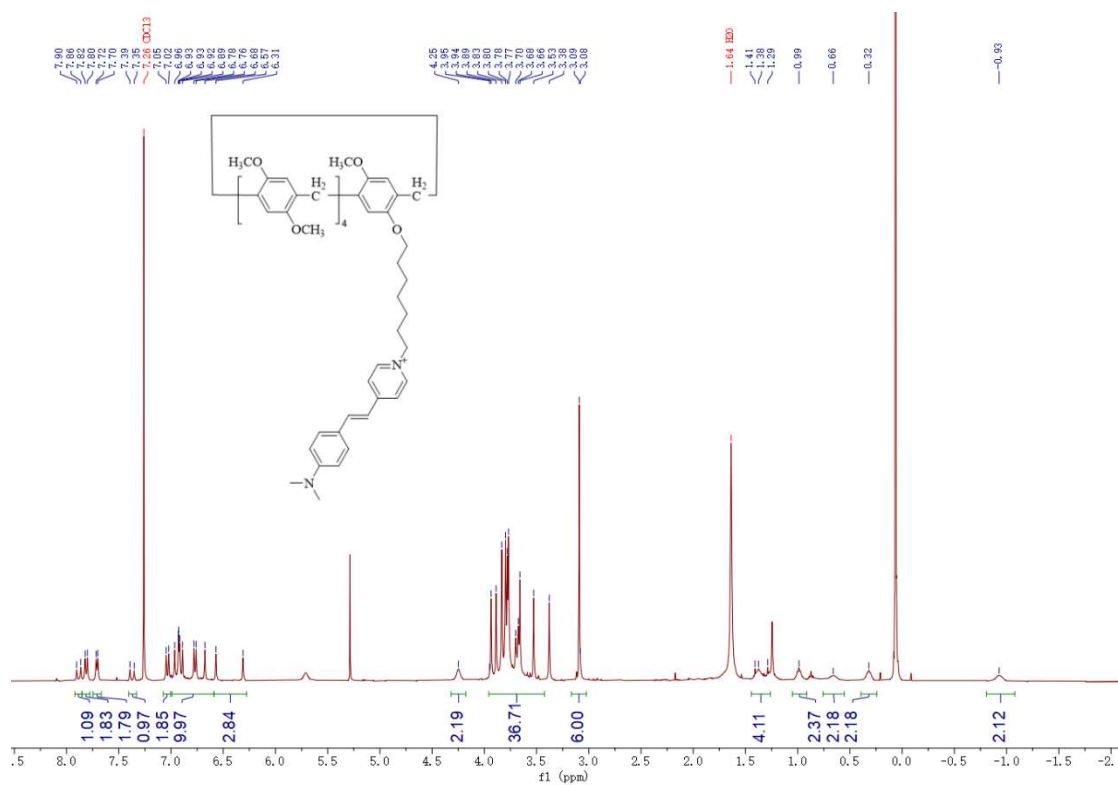

Figure S21. <sup>1</sup>H NMR of PI3.

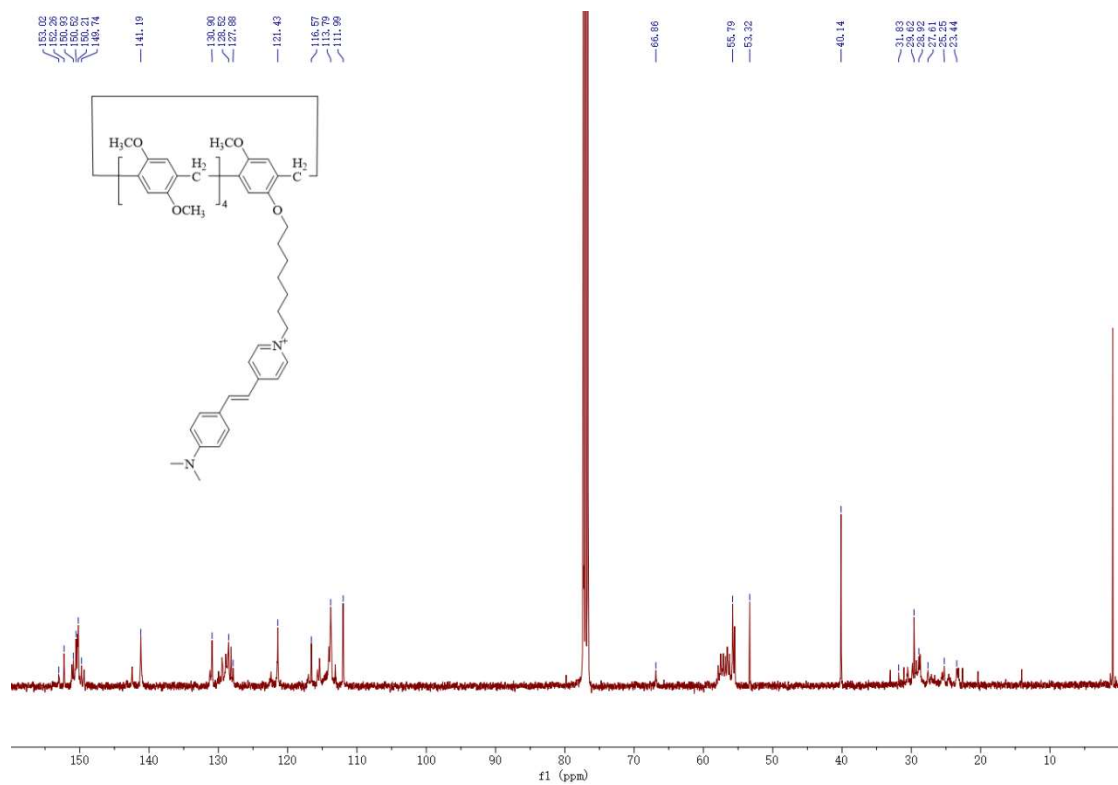

Figure S22. <sup>13</sup>C NMR of PI3.

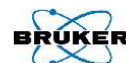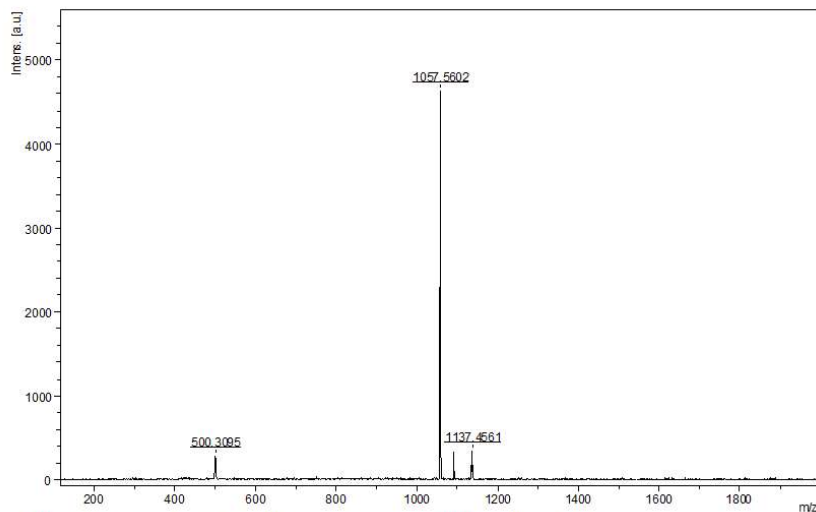

**Target**  
Target type 0280781  
Target serial number 1002410  
Position P20

**Laser**  
Laser beam attenuation 79  
Laser beam focus 35  
Laser repetition rate 2000 Hz  
Number of shots 1000

**Spectrometer**  
positive voltage polarity POS  
PIE delay 370 ns  
ion source voltage 1 19 kV  
ion source voltage 2 15.9 kV  
Lens voltage 8.6 kV  
Linear detector voltage 2.744 kV  
Deflection on Deflection mass  
Reflector voltage 1 21 kV  
Reflector voltage 2 9.6 kV  
Reflector detector volt. 1.702 kV

**Instrument**  
Instrument type autoflex  
Instrument serial 1857351.00824  
Name of computer FLEX-PC  
Operator ID or name admin  
flexControl version flexControl 3.4.168.0  
flexAnalysis version 3.4.79.0

**RESULT**  
Theoretical Mass = [M]<sup>+</sup> = 1057.5572  
Experimental Mass = [M]<sup>+</sup> = 1057.5602  
Error = 2.8367ppm

Date of Acquisition 2022-03-29T12:05:03.000 printed: 4/13/2022 11:21:52 AM  
Acquisitionmethod D:\users\Silvia\Method\S-RP\_900-4500\_05102021\_Da.par  
FileName D:\users\MSservice\Data\2022\Mar\P7Br\0\_P20\1

Bruker Daltonics

Figure S23. HRMS of PI3.

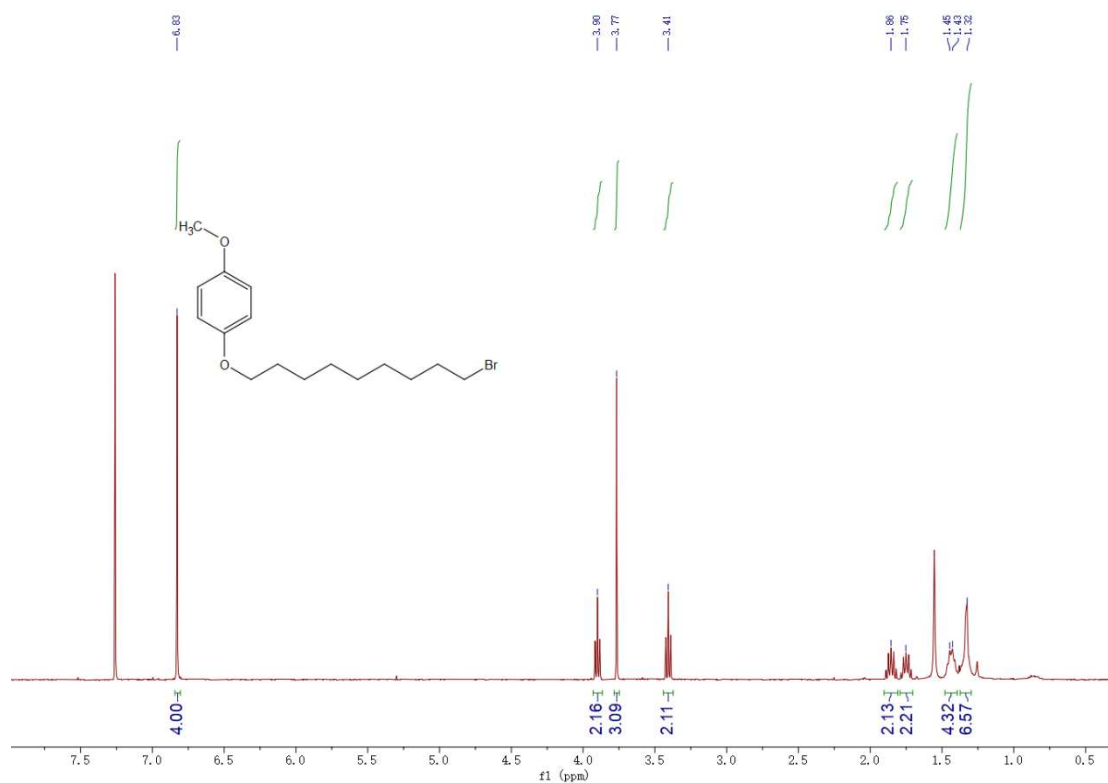

Figure S24. <sup>1</sup>H NMR of M4.

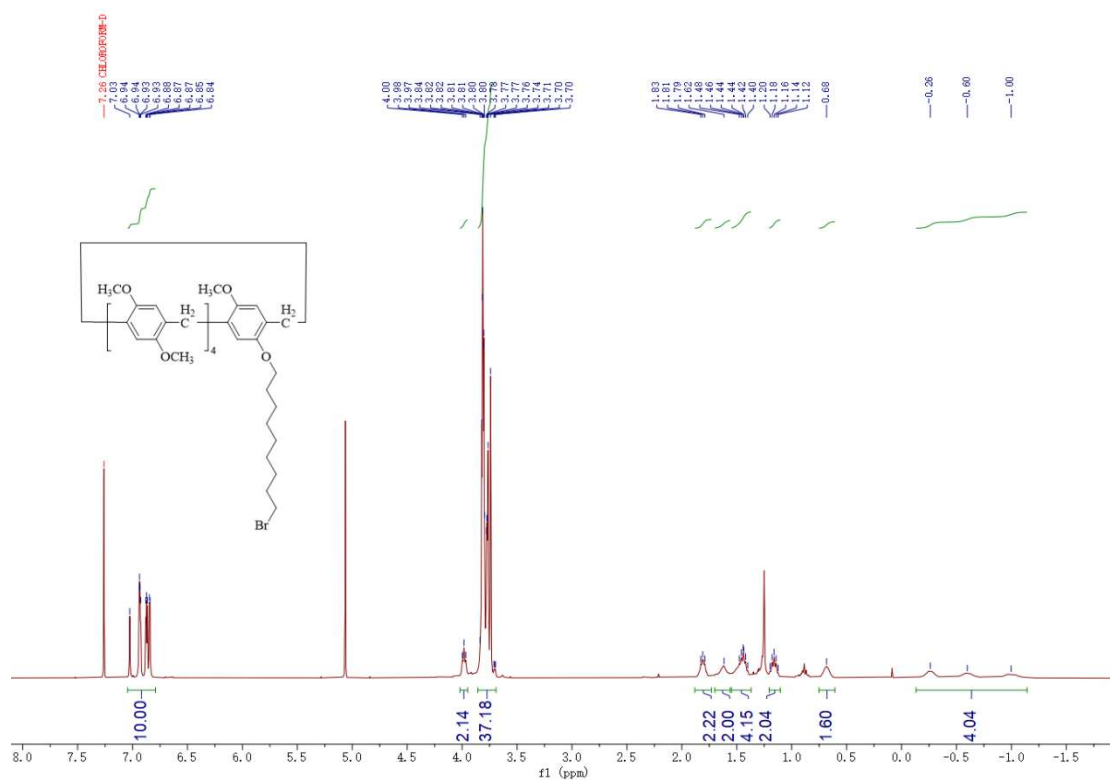

Figure S25. <sup>1</sup>H NMR of P4.

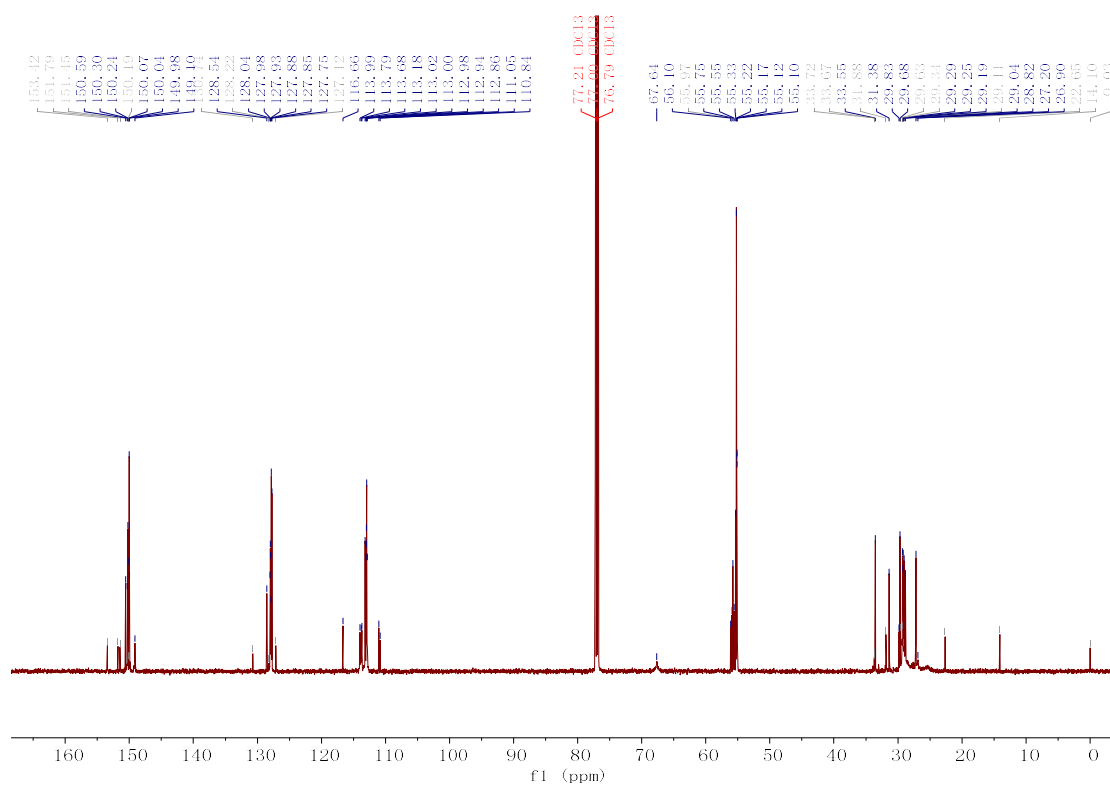

Figure S26. <sup>13</sup>C NMR of P4.

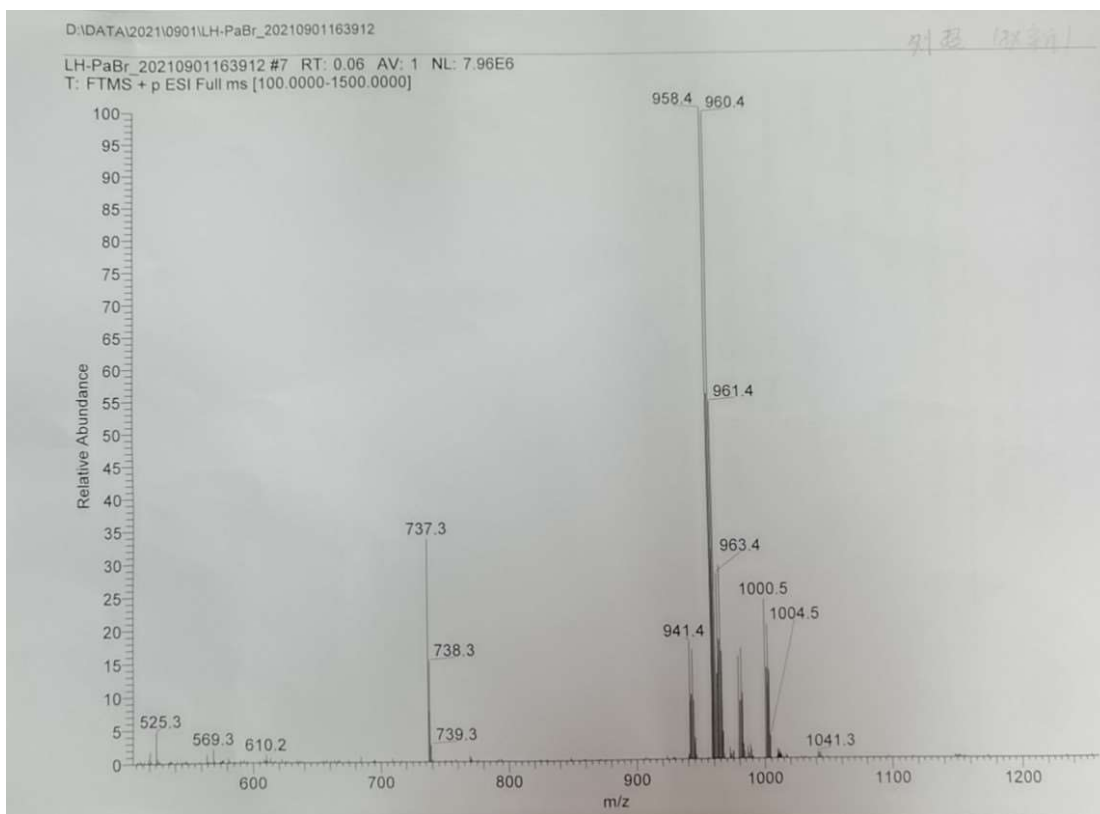

Figure S27. MS of P4.

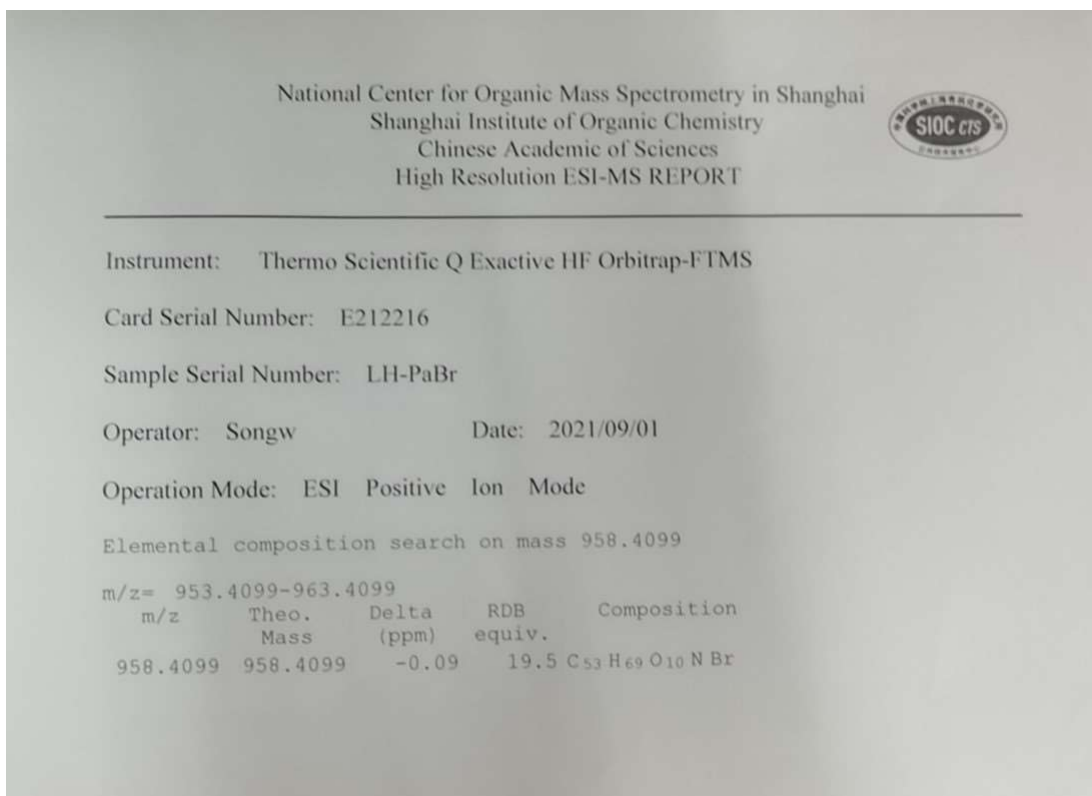

Figure S28. HRMS of P4.

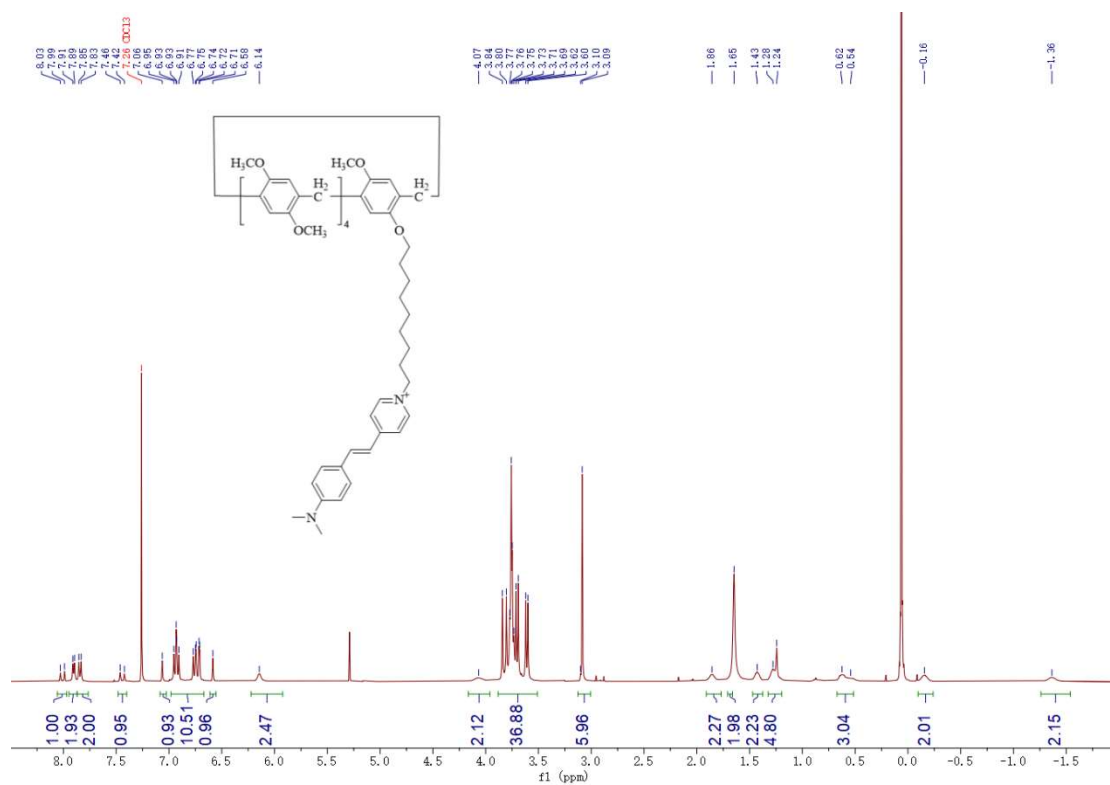

Figure S29. <sup>1</sup>H NMR of PI4.

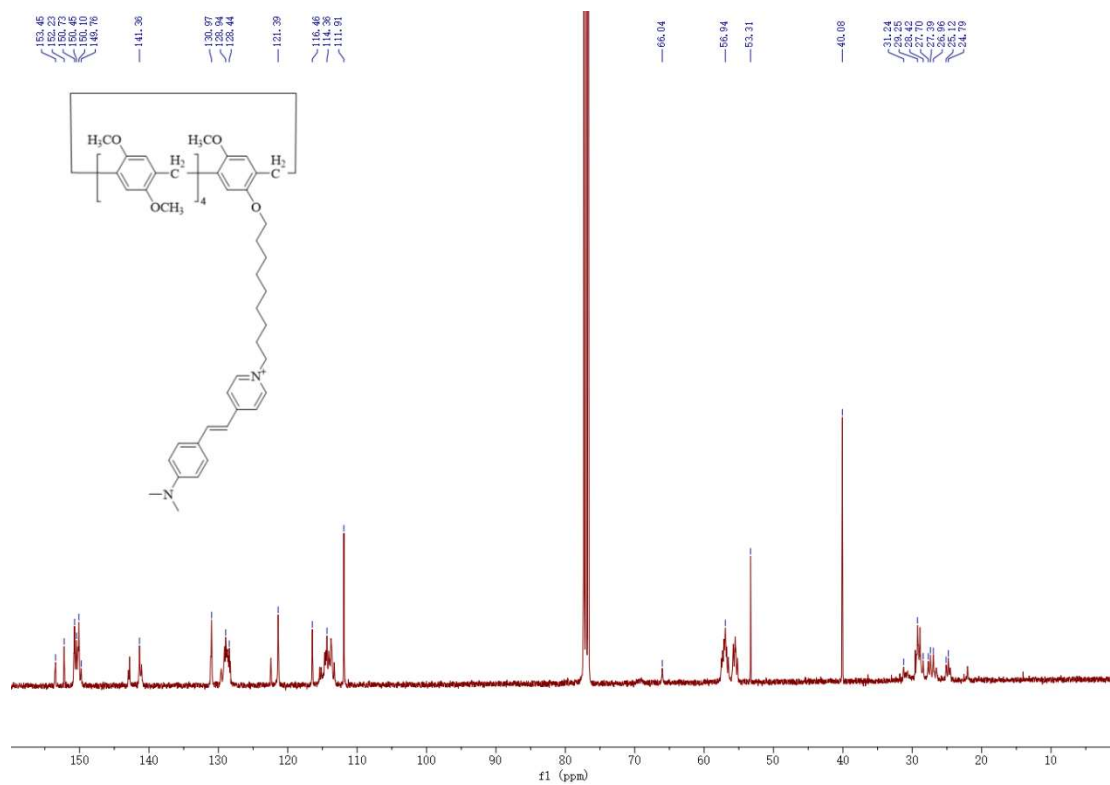

Figure S30. <sup>13</sup>C NMR of PI4.



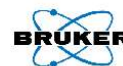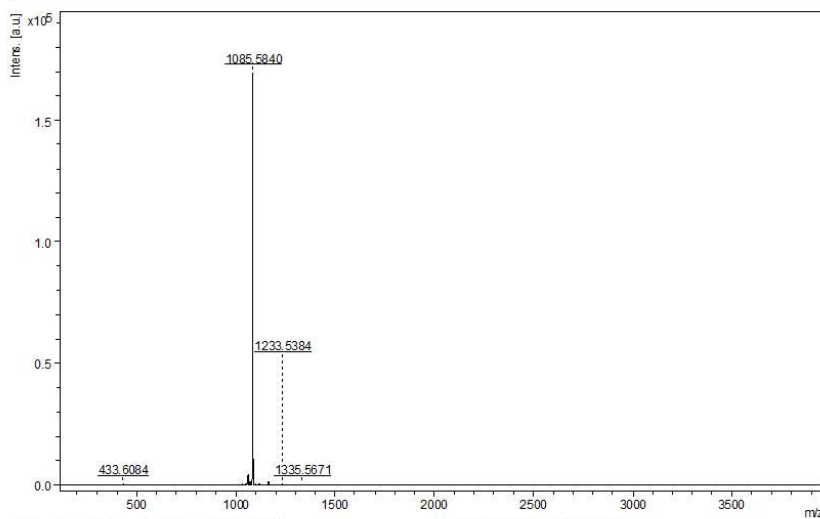

**Target**  
Target type 0230781  
Target serial number 1002410  
Position P13

**Laser**  
Laser beam attenuation 69  
Laser beam focus 35  
Laser repetition rate 2000 Hz  
Number of shots 1000

**Spectrometer**  
positive voltage polarity POS  
PIE delay 370 ns  
Ion source voltage 1 19 kV  
Ion source voltage 2 18.9 kV  
Lens voltage 8.6 kV  
Linear detector voltage 2.744 kV  
Deflection on  
Deflection mass  
Reflector voltage 1 21 kV  
Reflector voltage 2 9.6 kV  
Reflector detector volt. 1.702 kV

**Instrument**  
Instrument type autoflex  
Instrument serial 1857351.00824  
Name of computer FLEX-PC  
Operator ID or name admin  
flexControl version flexControl 3.4.168.0  
flexAnalysis version 3.4.79.0

**RESULT**  
Theoretical Mass = [M]<sup>+</sup> = 1085.5885  
Experimental Mass = [M]<sup>+</sup> = 1085.5840  
Error = -4.1452ppm

Date of Acquisition 2022-03-29T11:43:36.000 printed: 4/13/2022 11:27:19 AM  
Acquisitionmethod D:\users\Silvia\Method\S-RP\_900-4500\_05102021\_Da.par  
FileName D:\users\MSservice\Data\2022\Mar\P9B\i0\_P13\1

**Bruker Daltonics**

Figure S31. HRMS of PI4.

## Linker length

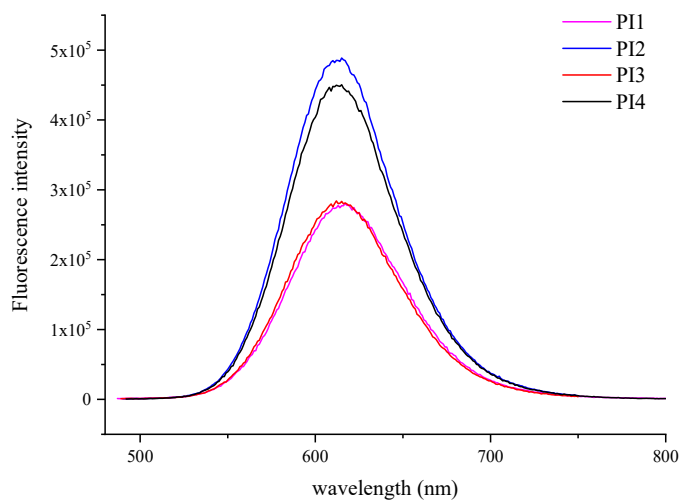

Fig. S32 Fluorescence emission spectra of the monosubstituted pillar[5]arene **PIn** ( $20 \mu\text{M}$ ) in DMSO at  $25^\circ\text{C}$ .

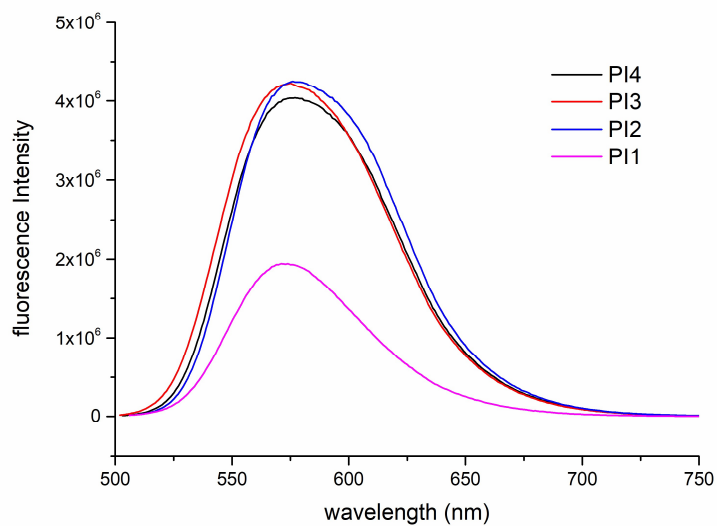

Fig. S33 Fluorescence emission spectra of the monosubstituted pillar[5]arene **PIn** ( $20 \mu\text{M}$ ) in chloroform at  $25^\circ\text{C}$ .

## Solvent

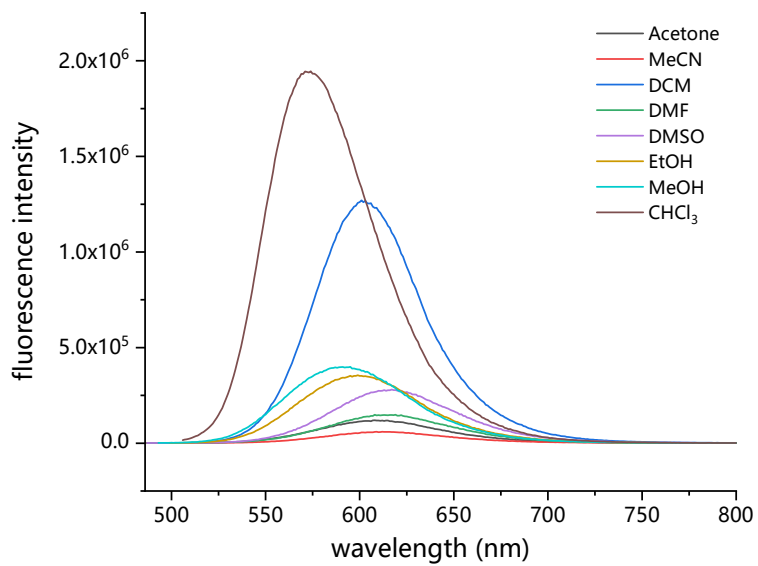

Fig. S34 Fluorescence emission spectra of **PI1** (20 μM) in various solvents.

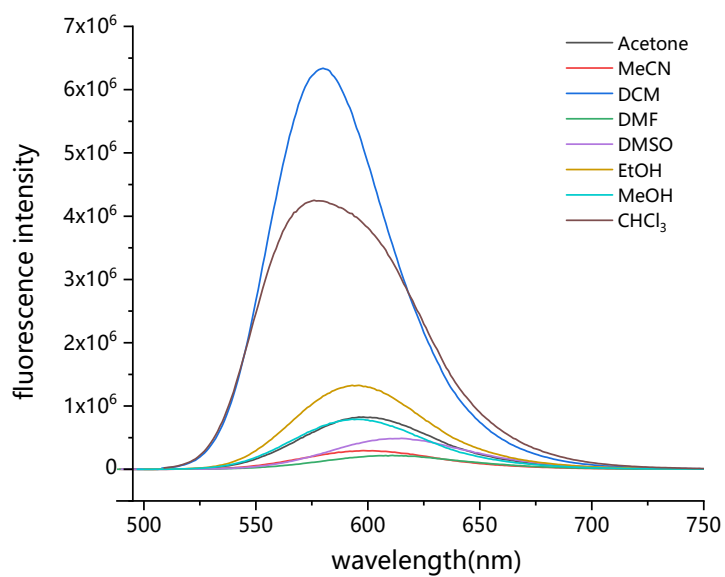

Fig. S35 Fluorescence emission spectra of **PI2** (20 μM) in various solvents.

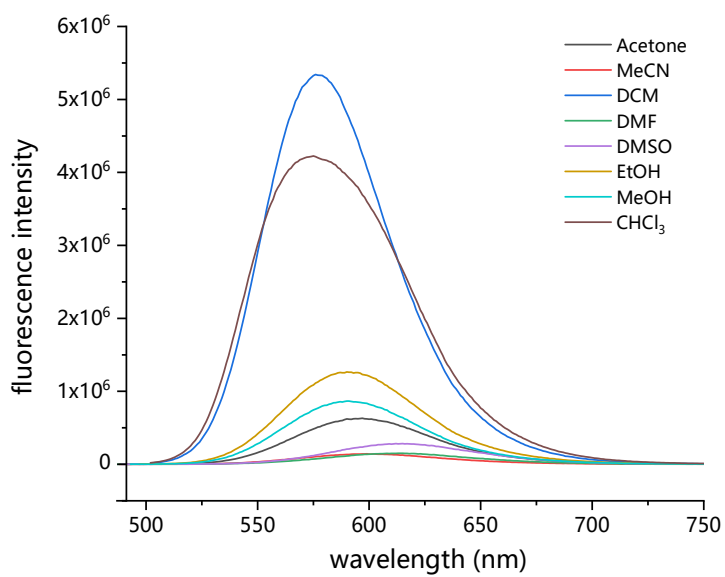

Fig. S36 Fluorescence emission spectra of **PI3** (20 μM) in various solvents.

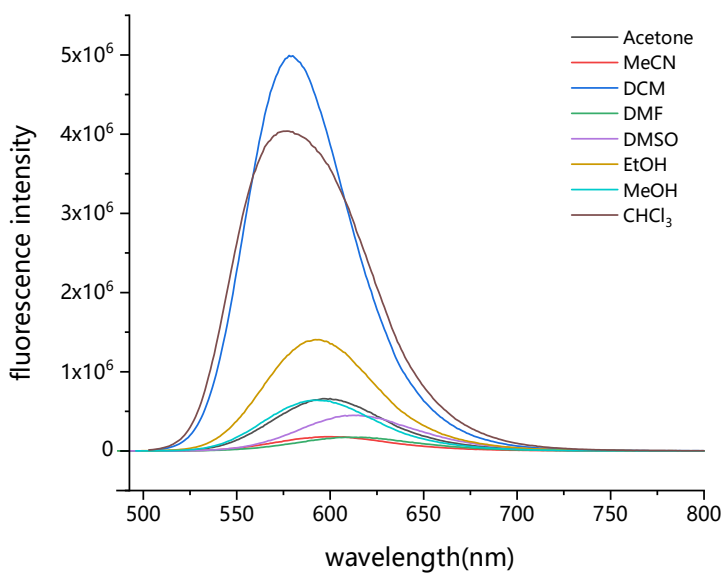

Fig. S37 Fluorescence emission spectra of **PI4** (20 μM) in various solvents.

## Stoke shift and quantum yield

Table S1. Stoke shifts of **PI**n and **DASP**.

| solvent           | Stoke shift (cm <sup>-1</sup> ) |            |            |            |             |
|-------------------|---------------------------------|------------|------------|------------|-------------|
|                   | <b>PI4</b>                      | <b>PI3</b> | <b>PI2</b> | <b>PI1</b> | <b>DASP</b> |
| CHCl <sub>3</sub> | 119048                          | 120482     | 126582     | 128205     | 153846      |
| DCM               | 120457                          | 120482     | 121951     | 129890     | 133333      |
| EtOH              | 97087                           | 97087      | 94340      | 94340      | 99010       |
| MeOH              | 83458                           | 83458      | 84340      | 89286      | 94340       |
| Acetone           | 75470                           | 75470      | 80090      | 78740      | 81301       |
| DMSO              | 71188                           | 72464      | 74074      | 75429      | 78740       |
| DMF               | 74758                           | 74942      | 75188      | 76336      | 79365       |
| MeCN              | 72645                           | 72645      | 74034      | 75188      | 80000       |

The fluorescence quantum yield ( $\phi$ ) is determined with the following equation-1,

$$\phi_F = \phi_{FR} (n^2 \times F \times A_R) / (n_R^2 \times F_R \times A) \quad (\text{equation-1})$$

Where  $\phi_{FR}$  is the fluorescence quantum yield of the reference compound (luciferin in ethanol).  $F$  and  $F_R$  are the integrated values of the fluorescence spectra for the sample and reference,  $A$  and  $A_R$  are the absorbance at the excitation wavelength, and  $n$  and  $n_R$  are the refractive indexes of the solvents.

# NOESY

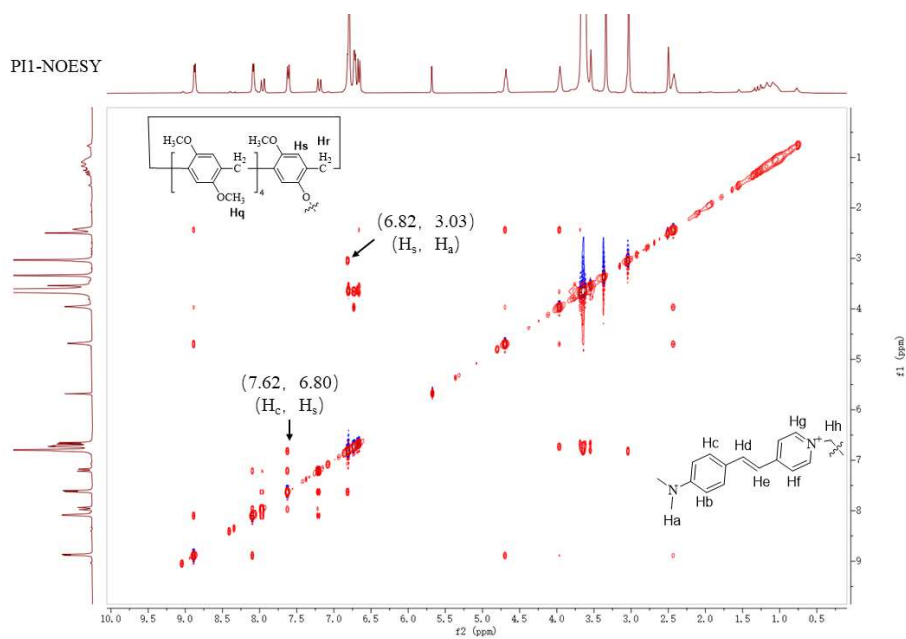

Fig. S38 NOESY spectrum of **PI1** (50 mM, in DMSO)

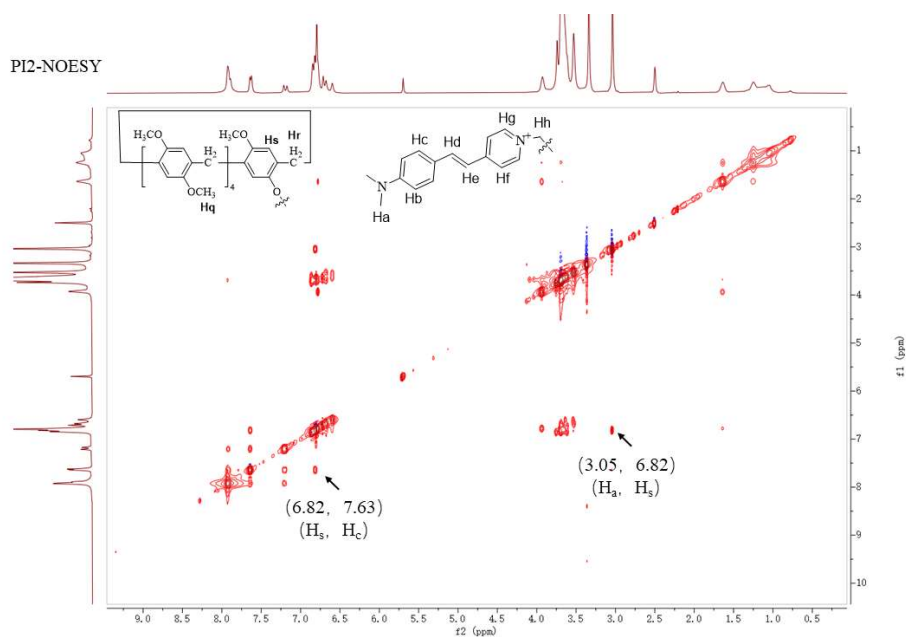

Fig. S39 NOESY spectrum of **PI2** (50 mM, in DMSO)

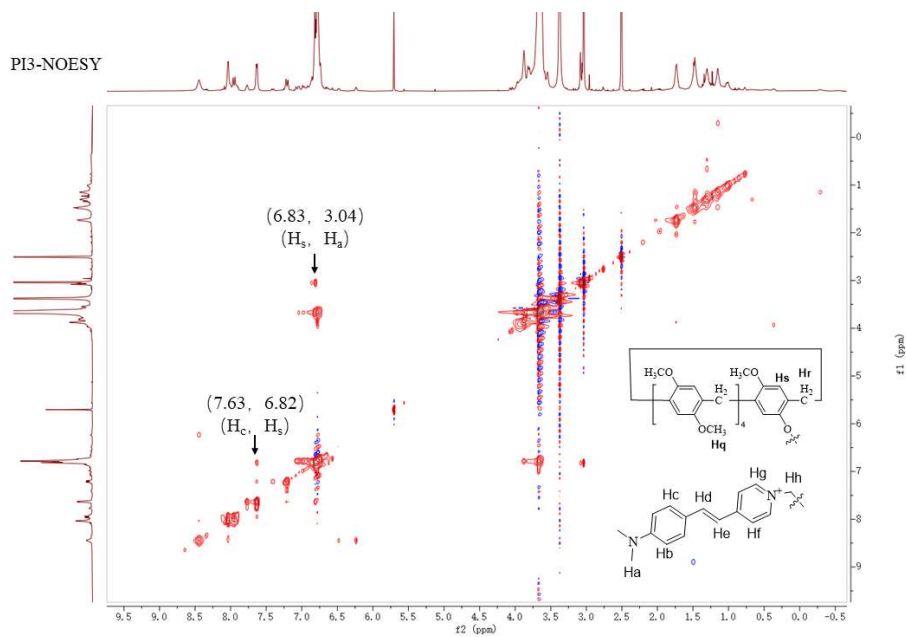

Fig. S40 NOESY spectrum of **PI3** (50 mM, in DMSO)

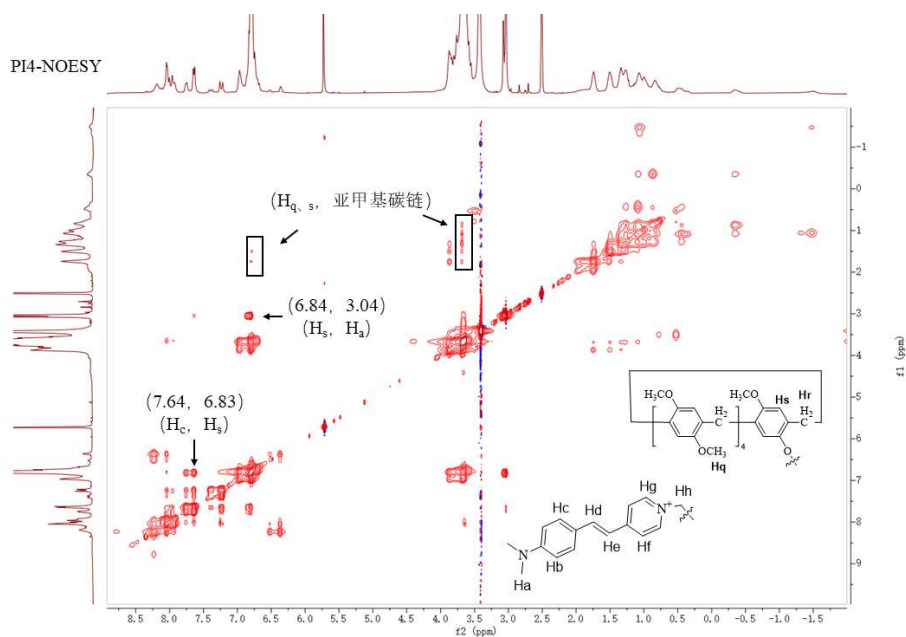

Fig. S41 NOESY spectrum of **PI4** (50 mM, in DMSO)

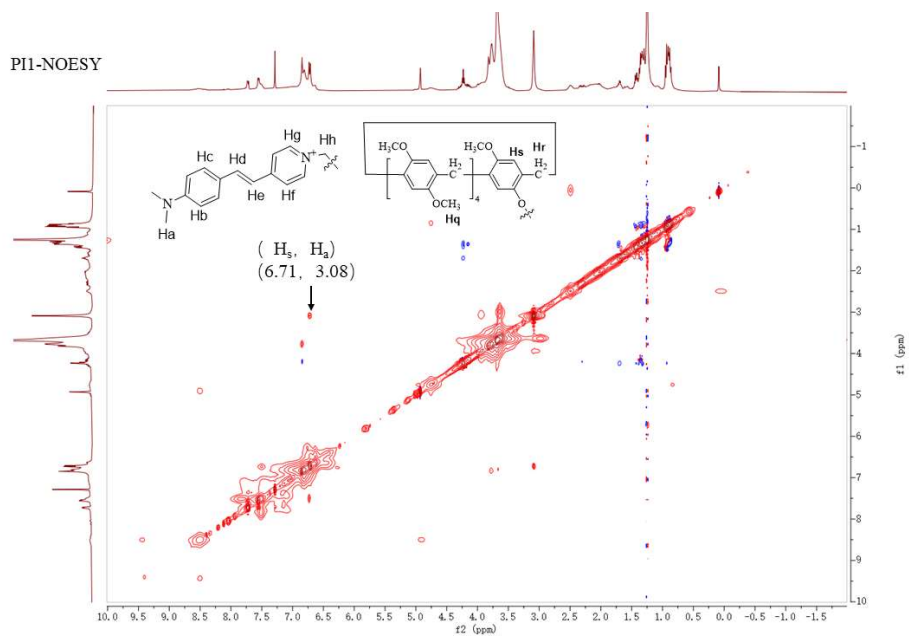

Fig. S42 NOESY spectrum of **PI1** (50 mM, in CDCl<sub>3</sub>)

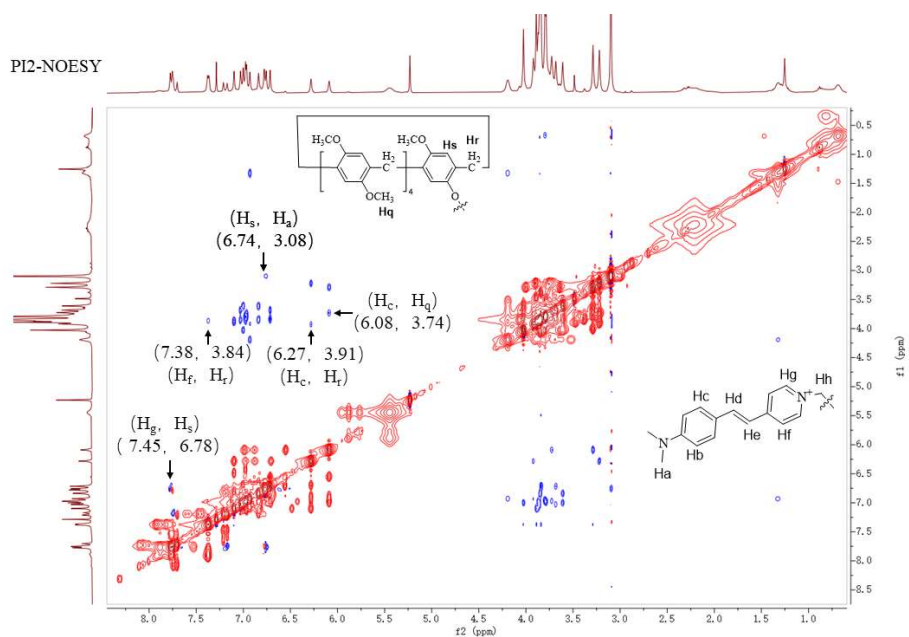

Fig. S43 NOESY spectrum of **PI2** (50 mM, in CDCl<sub>3</sub>)



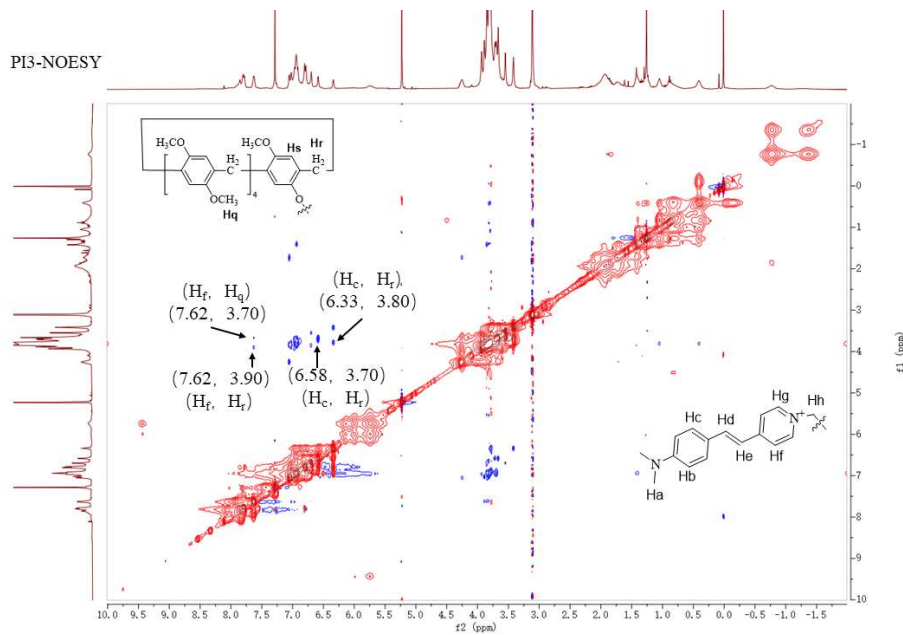

Fig. S44 NOESY spectrum of **PI3** (50 mM, in  $CDCl_3$ )

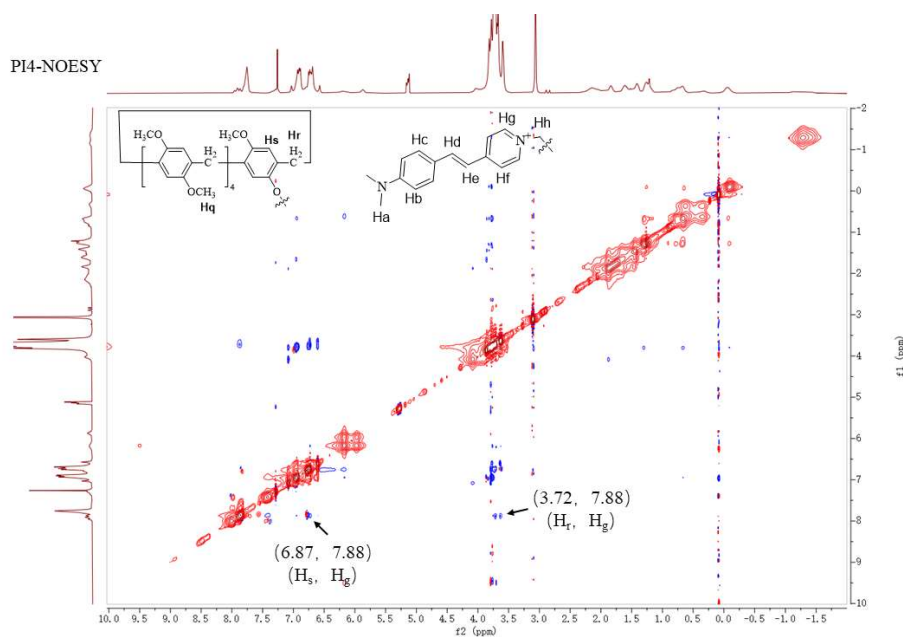

Fig. S45 NOESY spectrum of **PI4** (50 mM, in  $CDCl_3$ )

## Temperature

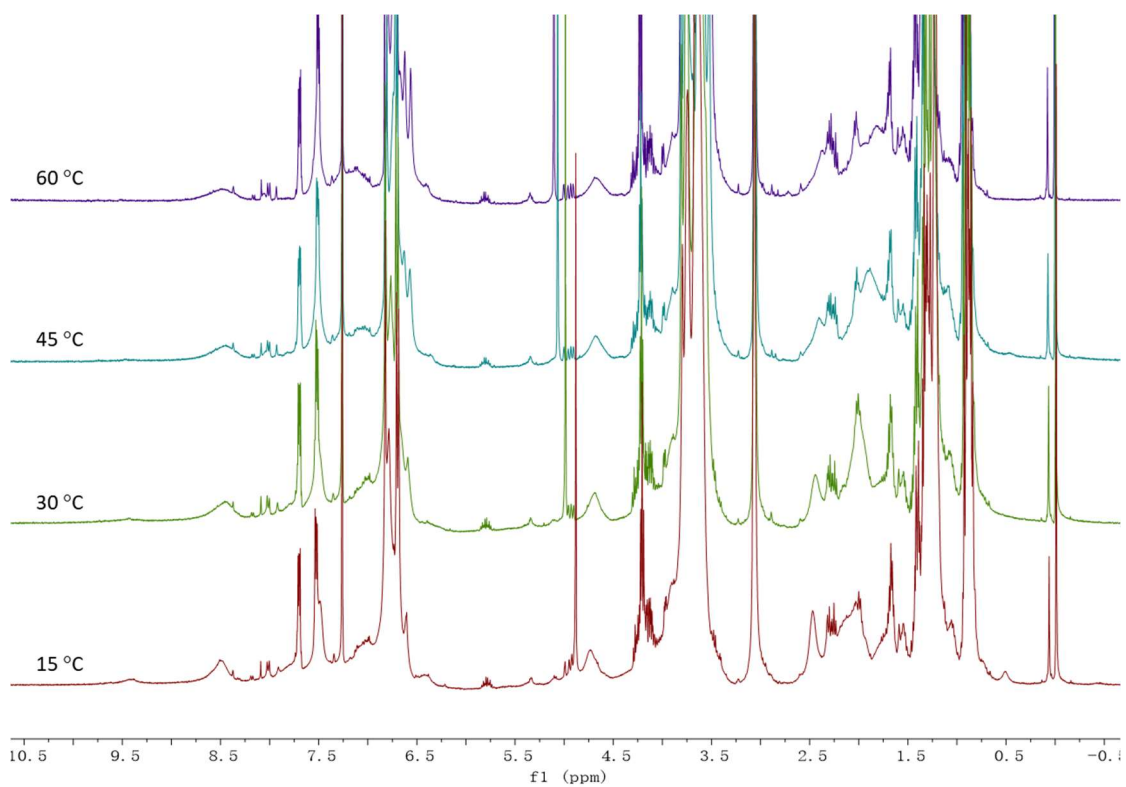

Fig. S46 Partial  $^1\text{H}$  NMR spectra of **PI1** at various temperature in  $\text{CDCl}_3$ .

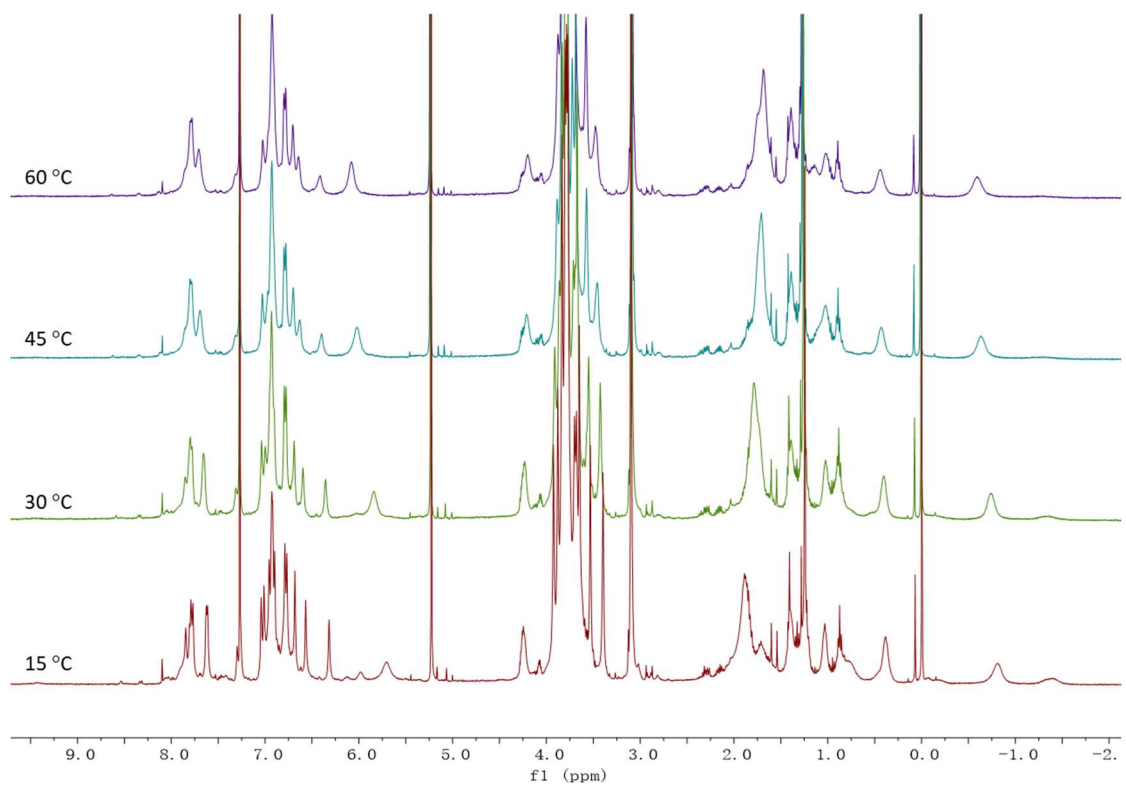

Fig. S47 Partial  $^1\text{H}$  NMR spectra of **PI3** at various temperature in  $\text{CDCl}_3$ .

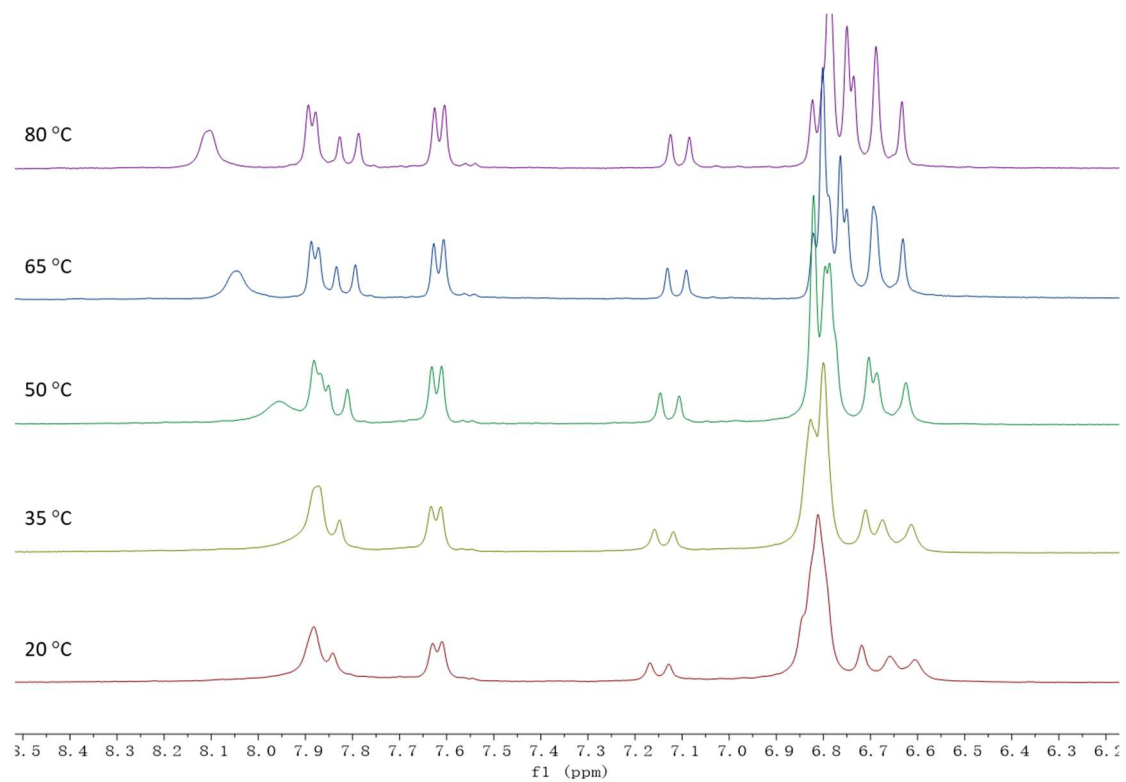

Fig. S48 Partial  $^1\text{H}$  NMR spectra of **PI2** at various temperature in DMSO.

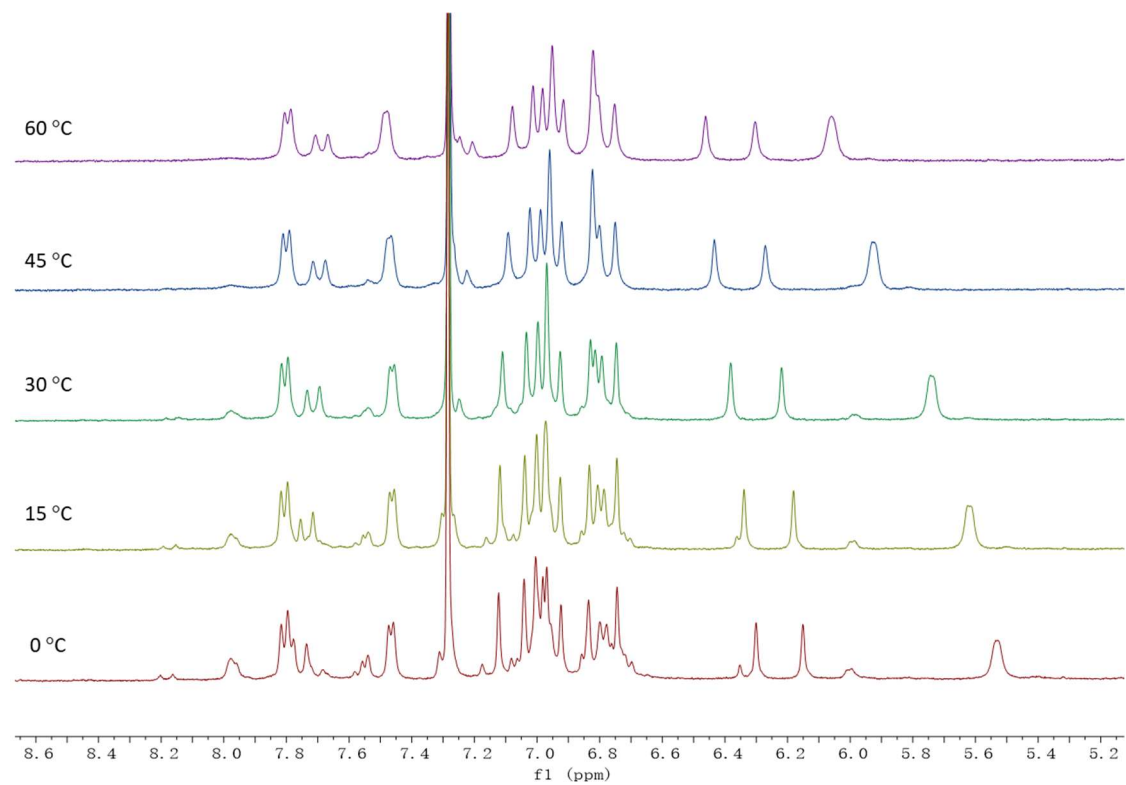

Fig. S49 Partial  $^1\text{H}$  NMR spectra of **PI2** at various temperature in  $\text{CDCl}_3$ .

## Temperature

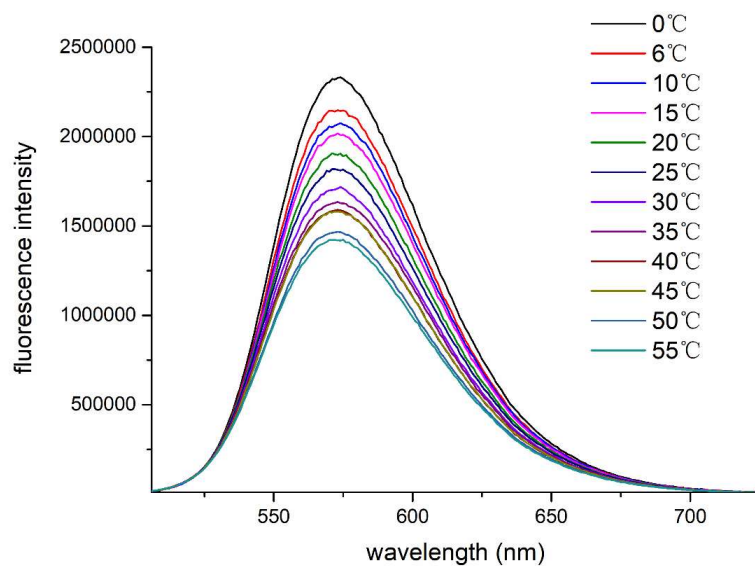

Fig. S50 Fluorescence emission spectra of **PI1** (20 μM) at various temperature in chloroform.

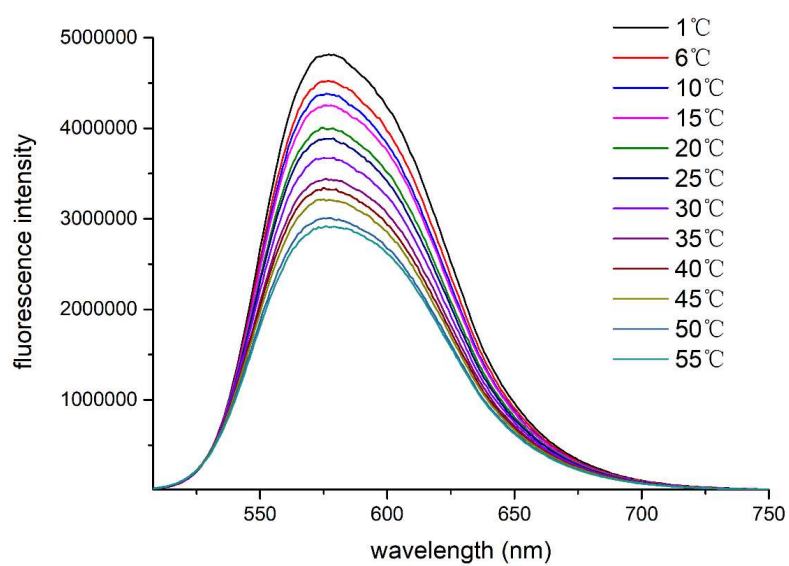

Fig. S51 Fluorescence emission spectra of **PI2** (20 μM) at various temperature in chloroform.

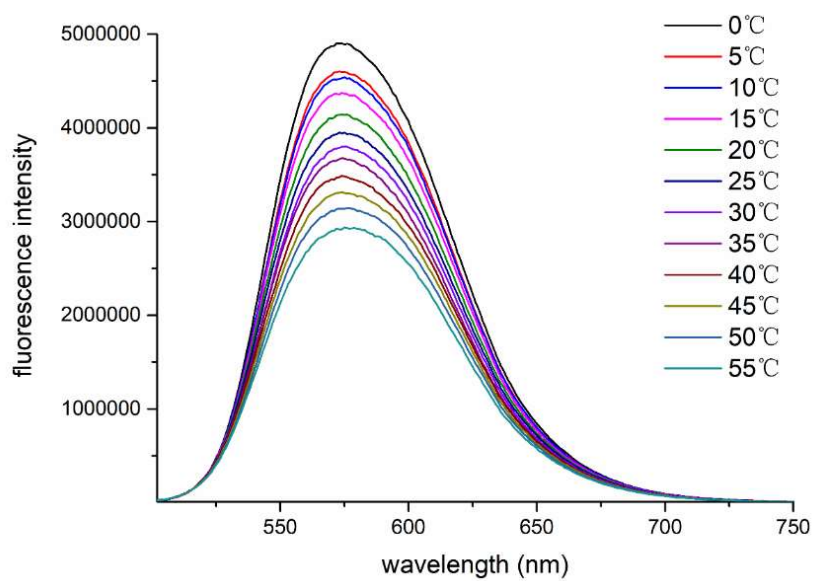

Fig. S52 Fluorescence emission spectra of **PI3** (20 μM) at various temperature in chloroform.

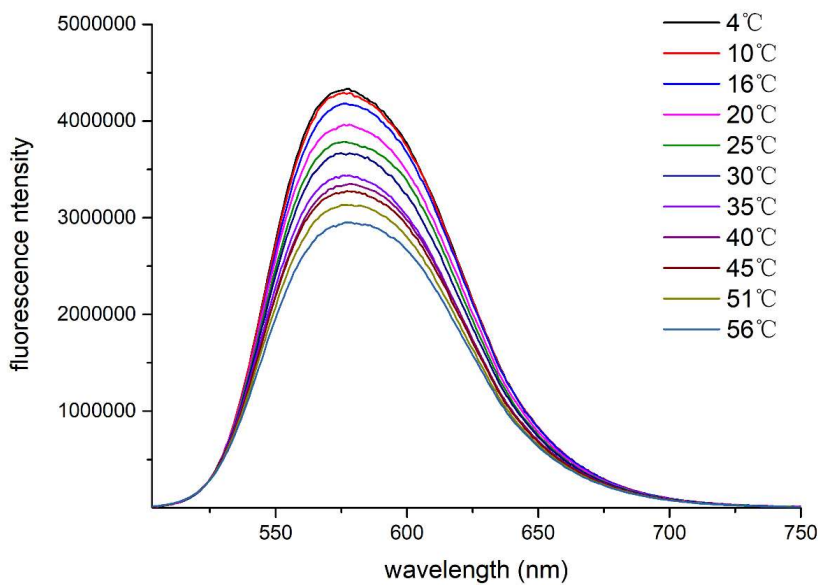

Fig. S53 Fluorescence emission spectra of **PI4** (20 μM) at various temperature in chloroform.

## Concentration

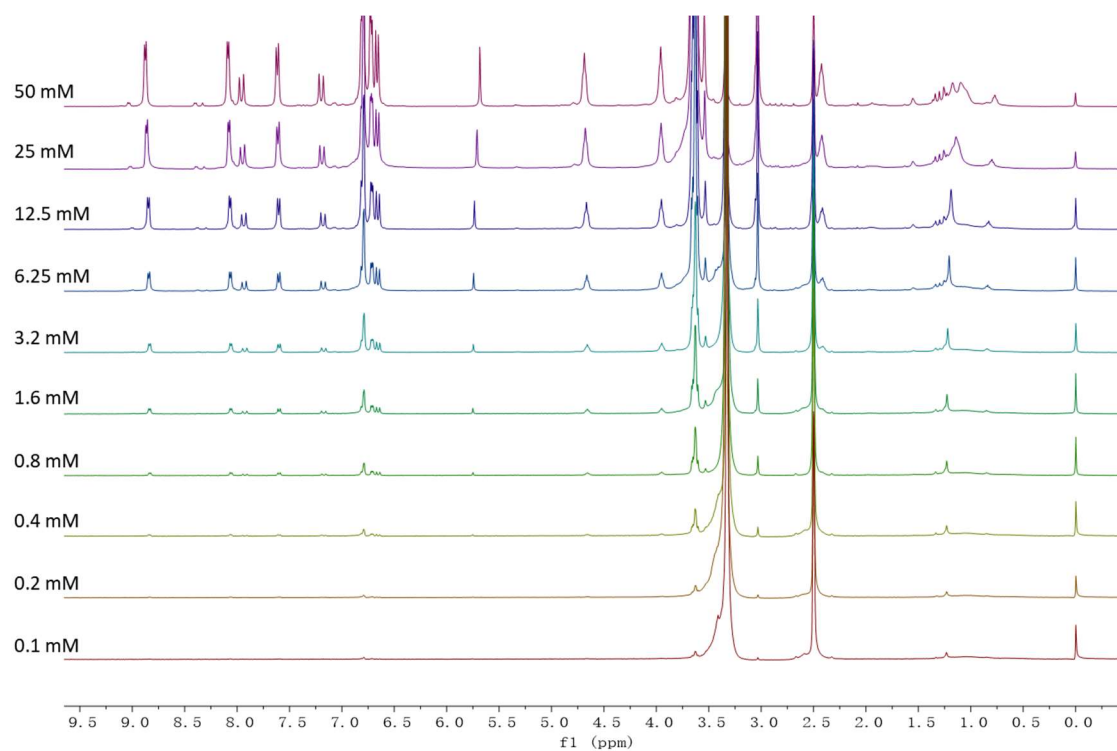

Fig. S54 **PI1** in DMSO at various concentration.

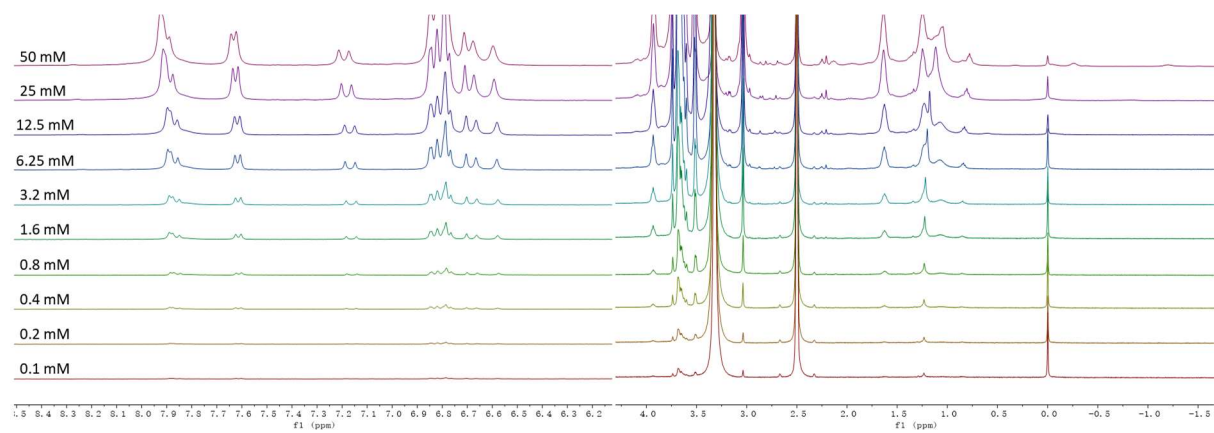

Fig. S55 **PI2** in DMSO at various concentration.

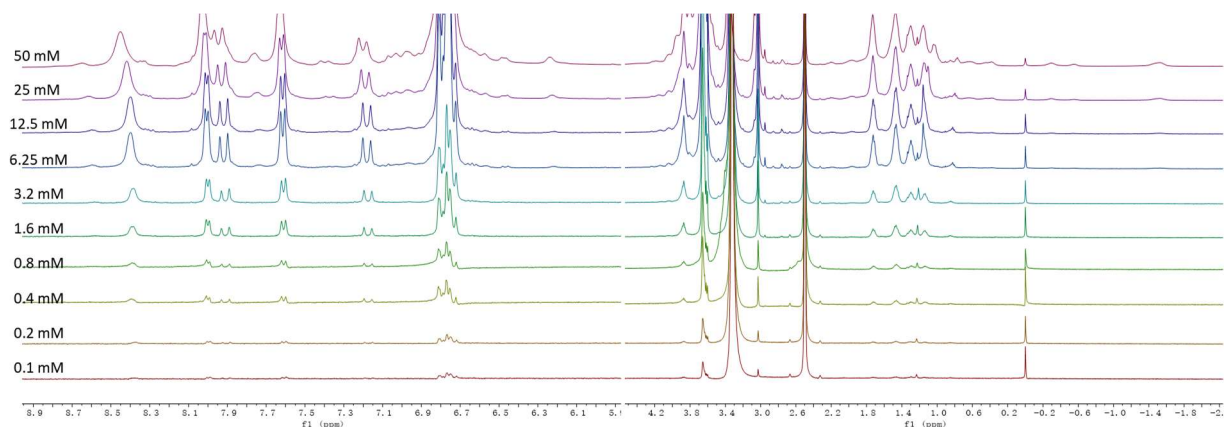

Fig. S56 **PI3** in DMSO at various concentration.

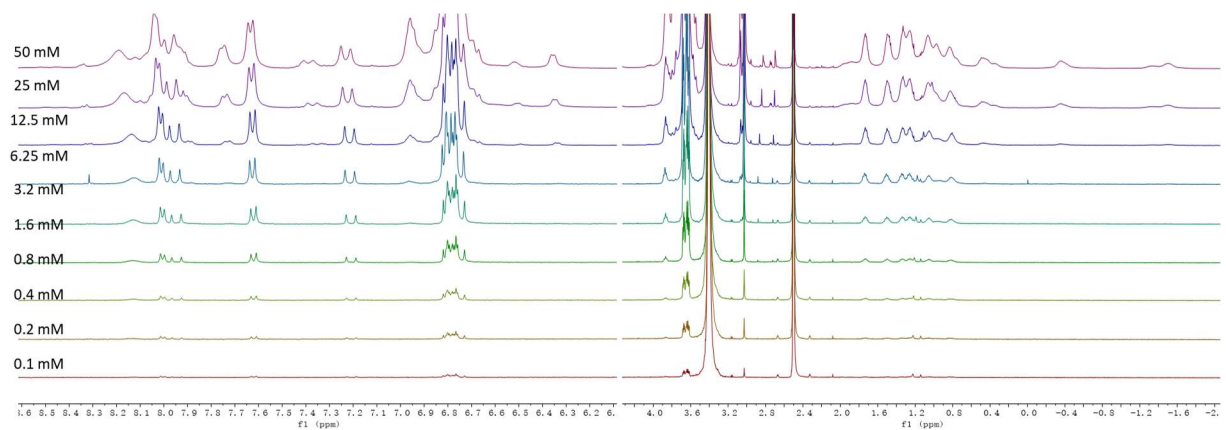

Fig. S57 **PI4** in DMSO at various concentration.

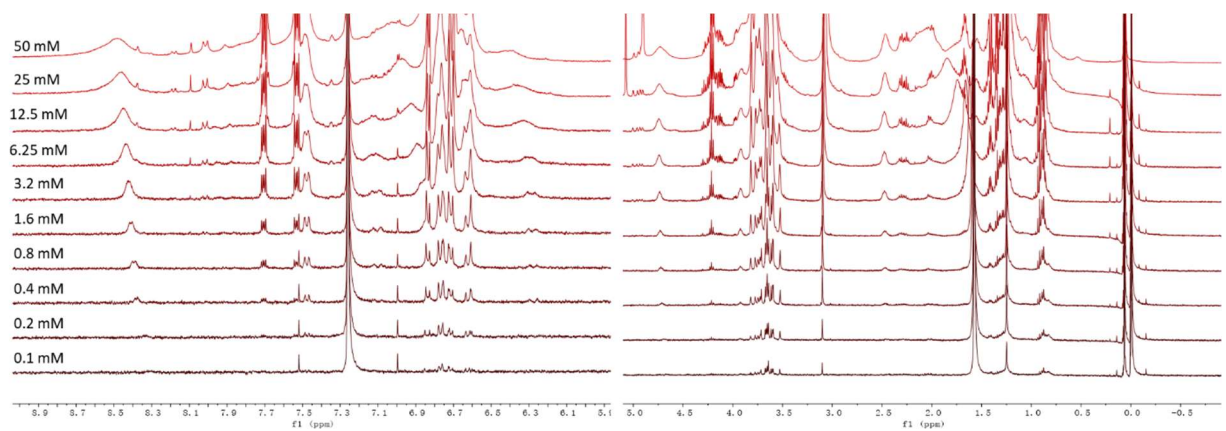

Fig. S58 **PI1** in CDCl<sub>3</sub> at various concentration.

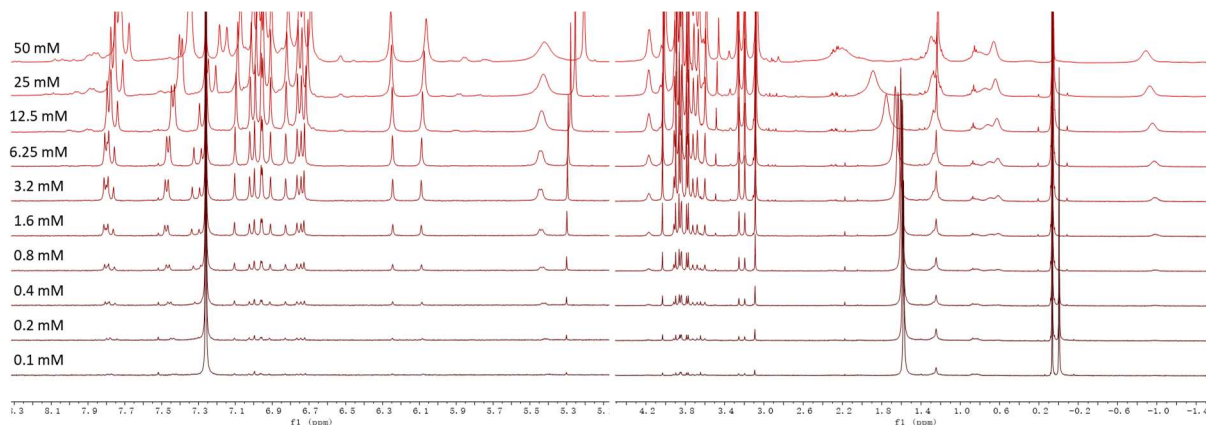

Fig. S59 **PI2** in CDCl<sub>3</sub> at various concentration.

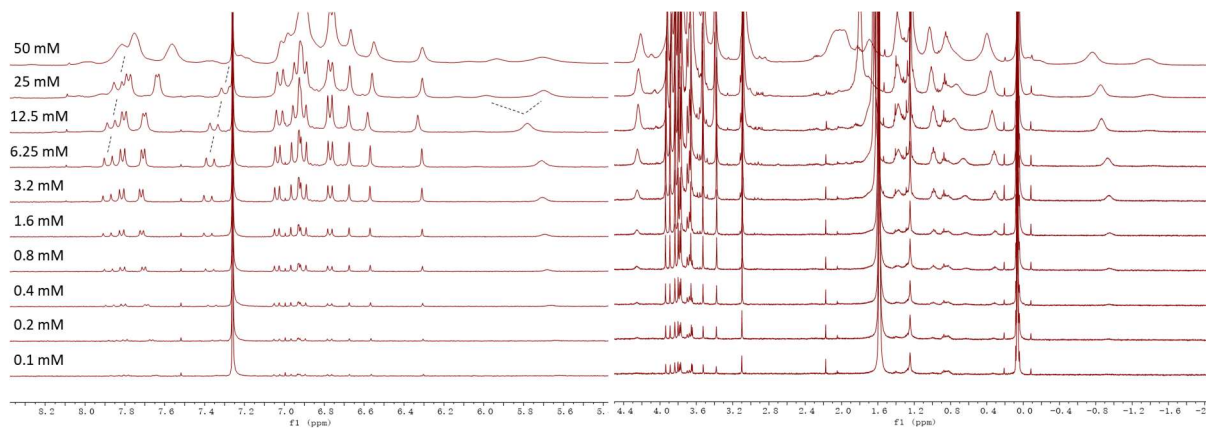

Fig. S60 **PI3** in CDCl<sub>3</sub> at various concentration.



## 2D DOSY

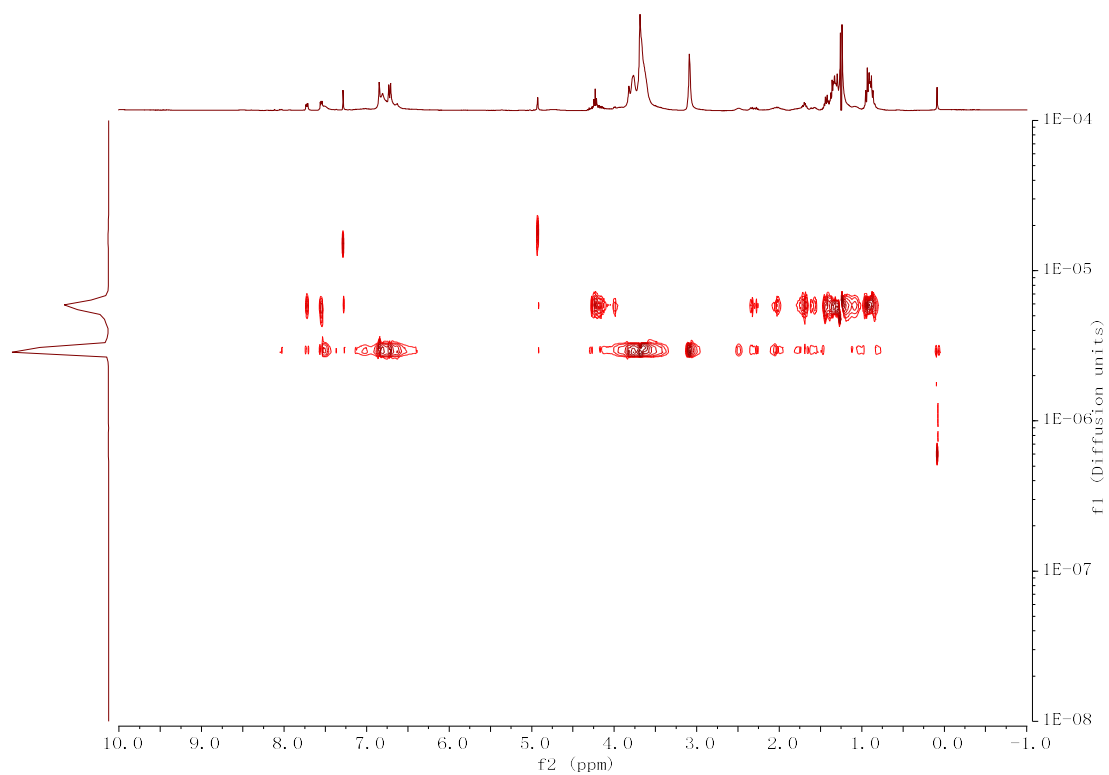

Fig. S61 2D Dosl of **PI1** in CDCl<sub>3</sub>.

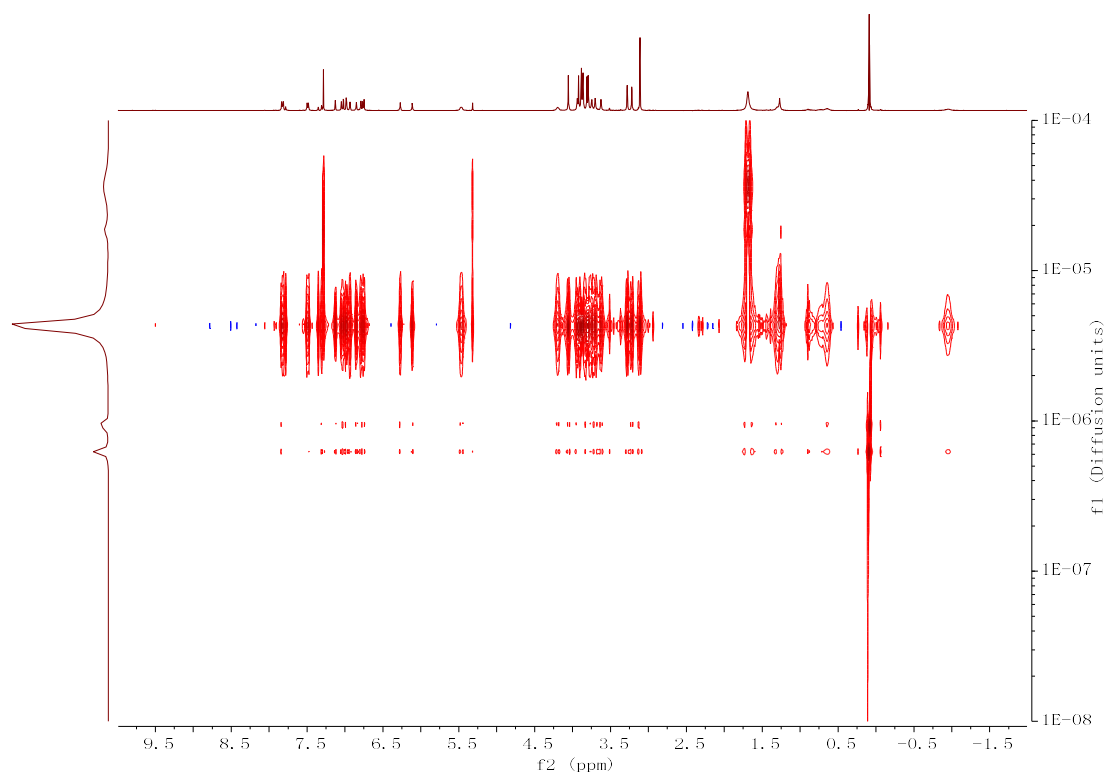

Fig. S62 2D Dosl of **PI2** in CDCl<sub>3</sub>.

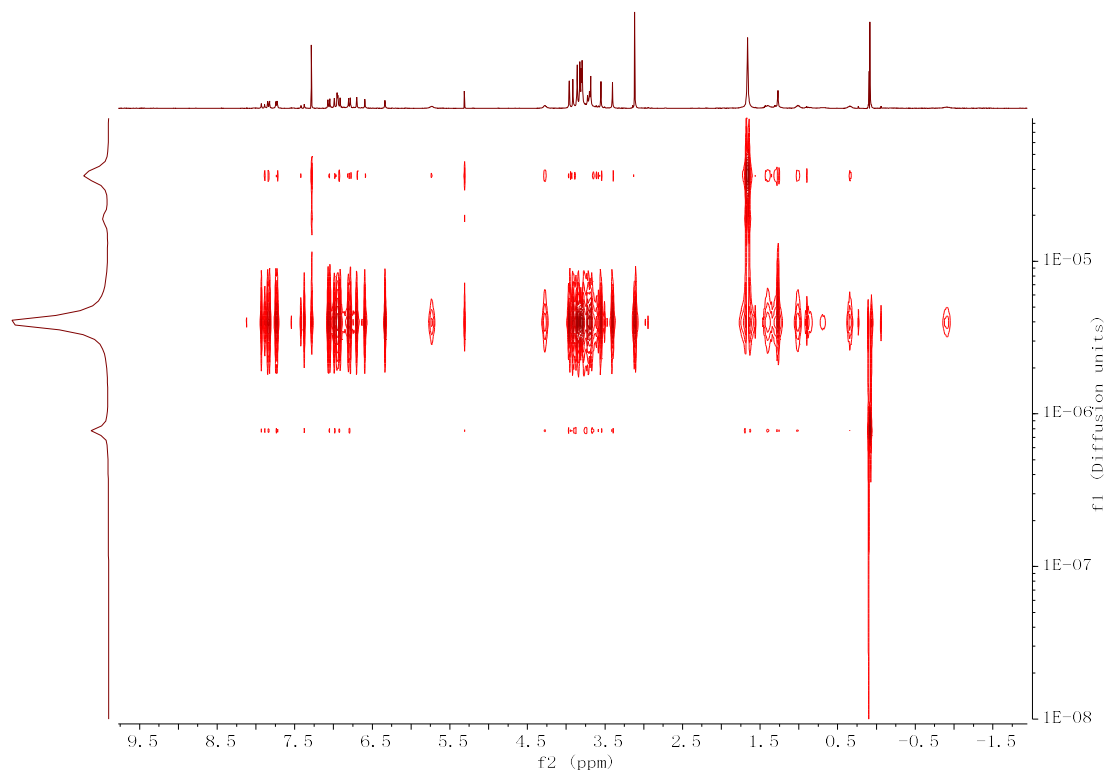

Fig. S63 2D Dosy of **PI3** in  $\text{CDCl}_3$ .

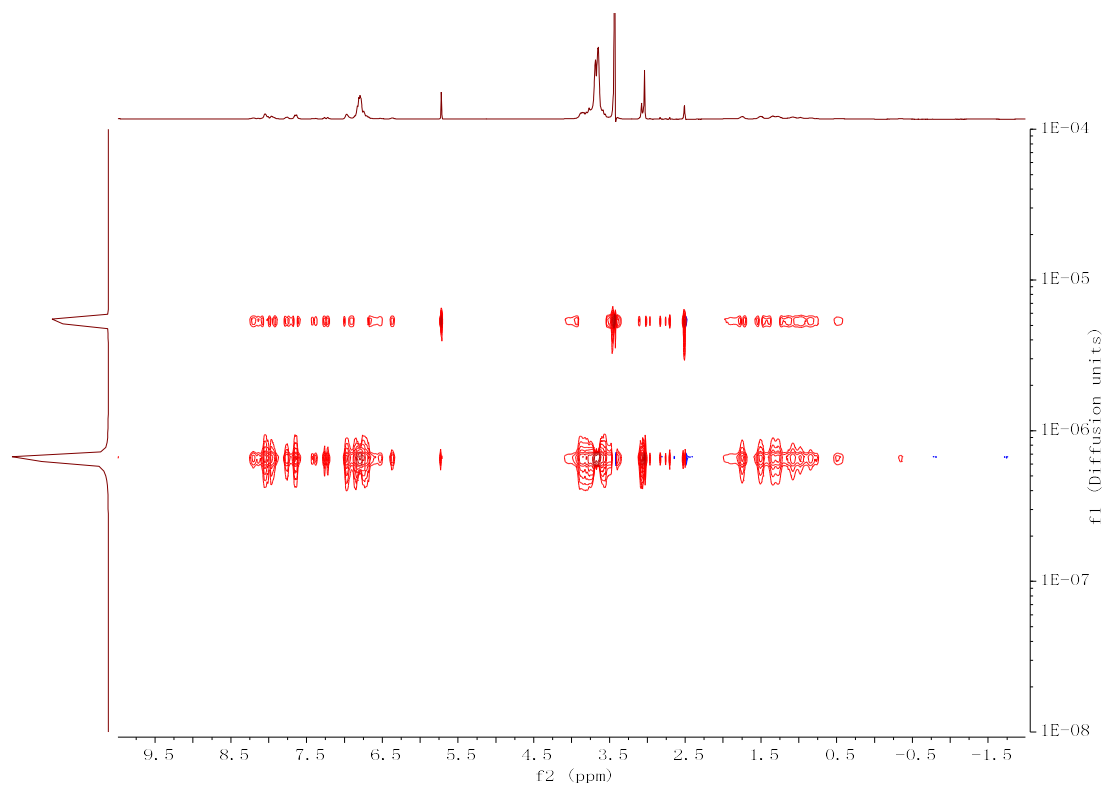

Fig. S64 2D Dosy of **PI4** in DMSO.
